# Supplementary material for: The causal relationship between type 2 diabetes mellitus and isolated REM sleep behavior disorder: results from multivariable and network Mendelian randomization analysis
Source: Front Endocrinol (Lausanne). 2024 Nov 25;15:1408053. doi: 10.3389/fendo.2024.1408053 (PMC11625559; doi:10.3389/fendo.2024.1408053)
Supplement: Supplementary file 1 [file Table1.xlsx]

## Sheet: Catalogue
The catalogue of supplementary tables
Supplementary Table S1: Results of LDSC between T2DM and iRBD.
Supplementary Table S2: Description of the genetic variants used as instrumental variables in the Mendelian randomization analysis.
Supplementary Table S3: Harmonized data for forward MR analyses with T2DM as the exposure factor and iRBD as the outcome.
Supplementary Table S4: Excluded SNPs related to confounding factors in the MR analysis.
Supplementary Table S5: MR reults with T2DM as the exposure factor and iRBD as the outcome.
Supplementary Table S6: Leave_one_out analysis reults with T2DM as the exposure factor and iRBD as the outcome.
Supplementary Table S7: Results of reverse MR analysis with iRBD as the expoure and T2DM as the outcome.
Supplementary Table S8: Harmonized data for forward MR analyses with three kinds of metabolic traits as the exposure factor and iRBD as the outcome.
Supplementary Table S9: Leave_one_out analysis reults with three kinds of metabolic traits as the exposure factor and iRBD as the outcome.
Supplementary Table S10: Harmonized data for MVMR analysis.
Supplementary Table S11: Harmonized data for MR analysis of T2DM on mediators and mediators on iRBD.
Supplementary Table S12: Sensitivity analysis of T2DM on mediators and mediators on iRBD.

## Sheet: S1
Supplementary Table S1: Results of LDSC between T2DM and iRBD.
Supplementary Table S1-1: Results of LDSC_h2.
Trait	mean_chisq	lambda_gc	intercept	intercept_se	ratio	ratio_se	h2_observed	h2_observed_se	h2_Z	h2_p
T2DM	1.67863	1.44919	1.14786	0.032846	0.217878	0.0484007	0.042195	0.00314444	13.4189	4.68e-41
iRBD	1.15434	1.16259	1.13955	0.0081797	0.90416	0.0529985	0.0834552	0.0548421	1.52174	0.128075
Supplementary Table S1-2: Results of LDSC_rg.
Exposure	Outcome	rg	rg_se	rg_p
T2DM	iRBD	0.306111	0.140123	0.028919

## Sheet: S2
Supplementary Table S2: Description of the genetic variants used as instrumental variables in the Mendelian randomization analysis.
Exposure	Data source	Number of LVs	Total R²	F-statistic (median [min, max])	Power
Type 2 diabetes	DIGRAM + GERA + UK Biobank	110	0.2181	1177 (397, 17155)	1
Blood glucose levels	UK Biobank	94	0.0283	108 (20, 1408)	1
Glycated hemoglobin levels	UK Biobank	299	0.0806	297 (20, 1080)	1
Fasting insulin levels	UK Biobank	22	0.0026	18 (10, 44)	0.86

## Sheet: S3
Supplementary Table S3: Harmonized data for forward MR analyses with T2DM as the exposure factor and iRBD as the outcome.
Exposure	Outcome	SNP	effect_allele	other_allele	beta	chr	pos	se	eaf	pval	R2	F
T2DM	iRBD	rs16988333	G	A	-0.0745	22	30156824	0.013	0.06362	9.17e-09	0.000661284	397.082
T2DM	iRBD	rs10077431	A	C	-0.0487	5	113591989	0.0089	0.1869	4.76e-08	0.000720844	428.502
T2DM	iRBD	rs11107116	T	G	0.0467	12	93584728	0.0085	0.2117	3.75e-08	0.000727907	440.74
T2DM	iRBD	rs7144011	T	G	0.0482	14	79474040	0.0085	0.2068	1.64e-08	0.00076218	461.009
T2DM	iRBD	rs11925227	A	G	-0.0534	3	171048829	0.0095	0.168	2.25e-08	0.000797159	468.906
T2DM	iRBD	rs7561798	G	A	0.04	2	228108944	0.0072	0.4751	2.79e-08	0.000798016	476.797
T2DM	iRBD	rs3756784	G	T	0.0505	6	131629093	0.0091	0.1988	2.59e-08	0.0008124	483.062
T2DM	iRBD	rs2299383	T	C	0.0412	7	103778399	0.0073	0.4095	1.49e-08	0.000820915	485.181
T2DM	iRBD	rs10114341	C	T	-0.0409	9	94156900	0.0072	0.4354	1.15e-08	0.000822443	495.597
T2DM	iRBD	rs17411031	G	C	-0.045	8	19994799	0.0081	0.2843	3.04e-08	0.000824068	498.902
T2DM	iRBD	rs17631783	T	C	-0.0487	17	63610240	0.0089	0.2545	3.95e-08	0.00089996	517.333
T2DM	iRBD	rs10740322	G	A	-0.0477	10	69725702	0.0085	0.2783	2.11e-08	0.00091398	519.117
T2DM	iRBD	rs963740	T	A	-0.0479	13	50521959	0.0086	0.2724	2.23e-08	0.000909496	527.392
T2DM	iRBD	rs7845219	C	T	-0.0422	8	94925274	0.0072	0.4732	4.55e-09	0.000887862	529.409
T2DM	iRBD	rs2908282	A	G	0.0552	7	44209229	0.0094	0.1779	4.25e-09	0.000891269	539.29
T2DM	iRBD	rs1061813	G	A	0.0429	5	14847222	0.0073	0.4503	3.37e-09	0.000911113	541.313
T2DM	iRBD	rs2294120	G	A	-0.0443	8	144778182	0.0079	0.4423	1.62e-08	0.000968178	542.151
T2DM	iRBD	rs1127655	C	T	0.0438	1	116987885	0.0079	0.493	2.47e-08	0.000959032	548.555
T2DM	iRBD	rs7240767	C	T	0.0451	18	7070643	0.0081	0.3817	2.16e-08	0.000960074	550.387
T2DM	iRBD	rs11926707	T	C	-0.0463	3	46884049	0.0082	0.3708	1.69e-08	0.00100028	564.615
T2DM	iRBD	rs17086692	T	G	-0.0467	4	52268127	0.0084	0.338	2.48e-08	0.000975974	565.785
T2DM	iRBD	rs11098676	T	C	-0.054	4	122911999	0.0096	0.2227	2.03e-08	0.00100955	579.419
T2DM	iRBD	rs9940149	A	G	-0.058	16	250642	0.0095	0.173	9.29e-10	0.000962582	582.973
T2DM	iRBD	rs7138300	C	T	0.0443	12	71045809	0.0072	0.4423	5.65e-10	0.000968178	583.358
T2DM	iRBD	rs2246618	T	C	0.0513	6	31511209	0.0084	0.2624	1.2e-09	0.00101871	585.03
T2DM	iRBD	rs7929543	C	A	0.0828	11	49329474	0.0138	0.08151	2.2e-09	0.00102654	595.506
T2DM	iRBD	rs13330951	G	A	-0.0456	16	69529939	0.0081	0.4901	1.54e-08	0.00103927	598.39
T2DM	iRBD	rs10087241	G	A	0.0475	8	31006206	0.008	0.3867	2.8e-09	0.0010702	606.289
T2DM	iRBD	rs2867125	T	C	-0.0601	2	622827	0.0096	0.17	4.33e-10	0.00101931	607.913
T2DM	iRBD	rs7674212	T	G	-0.0465	4	103067742	0.0075	0.4245	6.18e-10	0.00105647	609.966
T2DM	iRBD	rs982077	A	G	0.0453	15	63531102	0.0072	0.4483	2.58e-10	0.00101508	612.669
T2DM	iRBD	rs348330	G	A	0.0487	1	229537208	0.0081	0.3579	1.86e-09	0.00109007	620.695
T2DM	iRBD	rs2493394	G	A	0.073	1	119928601	0.0113	0.1103	1.15e-10	0.00104591	622.055
T2DM	iRBD	rs17405722	A	G	0.087	17	42390483	0.0146	0.07952	2.28e-09	0.00110805	635.839
T2DM	iRBD	rs7685296	T	C	-0.0511	4	152332969	0.0081	0.2883	2.32e-10	0.00107155	639.836
T2DM	iRBD	rs2292662	T	C	-0.0629	3	63911539	0.0111	0.17	1.24e-08	0.0011165	640.22
T2DM	iRBD	rs12299509	G	A	0.0467	12	4297115	0.0073	0.4553	2.09e-10	0.00108173	641.382
T2DM	iRBD	rs4823182	G	A	0.0482	22	43981562	0.0077	0.3807	3.36e-10	0.00109549	644.001
T2DM	iRBD	rs2237892	T	C	-0.096	11	2818521	0.0157	0.06262	8.75e-10	0.00108194	644.242
T2DM	iRBD	rs12945601	T	C	0.048	17	17750097	0.008	0.4374	1.72e-09	0.00113394	649.644
T2DM	iRBD	rs9844972	C	G	0.0956	3	150379848	0.0148	0.06759	1.03e-10	0.00115195	651.407
T2DM	iRBD	rs1758632	C	G	-0.0491	9	34025642	0.0081	0.3837	1.36e-09	0.00114019	654.845
T2DM	iRBD	rs622217	C	T	-0.0485	6	160345738	0.0077	0.4821	3.13e-10	0.00117462	657.028
T2DM	iRBD	rs67232546	T	C	0.0596	11	128529043	0.0096	0.2068	4.66e-10	0.00116535	657.566
T2DM	iRBD	rs840967	C	A	0.0497	2	65474623	0.008	0.3777	5.44e-10	0.00116115	663.051
T2DM	iRBD	rs10401969	C	T	0.0921	19	19296909	0.0133	0.07058	4.13e-12	0.00111287	673.356
T2DM	iRBD	rs72892910	T	G	0.0648	6	50849174	0.0099	0.173	6.43e-11	0.00120152	676.81
T2DM	iRBD	rs735949	C	T	-0.0711	4	184795078	0.0106	0.1292	1.95e-11	0.0011375	680.278
T2DM	iRBD	rs10100265	A	C	0.0491	8	10775649	0.0079	0.3897	6.29e-10	0.00114675	682.09
T2DM	iRBD	rs1050226	G	A	-0.0491	6	7281421	0.0074	0.4085	3.34e-11	0.00116504	692.368
T2DM	iRBD	rs576674	G	A	0.0654	13	32980164	0.0097	0.163	1.79e-11	0.00116707	694.399
T2DM	iRBD	rs7729395	T	C	0.1373	5	102764872	0.016	0.03181	1.1e-17	0.00116117	694.571
T2DM	iRBD	rs17791483	G	A	-0.102	9	79284065	0.0147	0.05964	3.42e-12	0.00116698	697.728
T2DM	iRBD	rs2925979	T	C	0.0534	16	81501185	0.0078	0.2883	9.06e-12	0.00117018	698.36
T2DM	iRBD	rs993380	A	G	0.0507	4	82663343	0.0081	0.3748	4.59e-10	0.00120466	698.549
T2DM	iRBD	rs4865796	G	A	-0.053	5	53976834	0.0078	0.3032	1.33e-11	0.00118691	709.995
T2DM	iRBD	rs9369425	G	A	0.0546	6	43843237	0.0085	0.2992	1.13e-10	0.00125018	724.184
T2DM	iRBD	rs12970134	A	G	0.0555	18	60217517	0.008	0.2674	5.31e-12	0.00120682	727.869
T2DM	iRBD	rs12617659	T	C	-0.0685	2	120552183	0.0103	0.16	2.83e-11	0.00126128	760.067
T2DM	iRBD	rs12910825	G	A	0.0517	15	90968030	0.0074	0.3807	2.16e-12	0.00126036	763.543
T2DM	iRBD	rs2820426	A	G	-0.0521	1	219487193	0.0073	0.3807	1.3e-12	0.00127994	766.301
T2DM	iRBD	rs4686471	T	C	-0.0534	3	188023111	0.0081	0.3956	4.28e-11	0.00136362	770.969
T2DM	iRBD	rs7572970	A	G	-0.059	2	160280145	0.0087	0.2604	1.39e-11	0.00134082	774.696
T2DM	iRBD	rs12088739	G	A	-0.0884	1	51041214	0.013	0.09145	9.79e-12	0.00129857	775.521
T2DM	iRBD	rs753270	T	C	-0.0528	10	79205218	0.0079	0.4195	2.7e-11	0.00135779	776.65
T2DM	iRBD	rs2296173	G	A	0.065	1	39447679	0.0087	0.1958	7.66e-14	0.00133056	795.923
T2DM	iRBD	rs825476	C	T	-0.0524	12	124083909	0.0073	0.4314	6.81e-13	0.00134704	805.282
T2DM	iRBD	rs1333039	G	C	-0.0534	9	22065658	0.0074	0.4006	5.64e-13	0.00136943	816.043
T2DM	iRBD	rs853974	T	C	0.0601	6	126747838	0.0088	0.2753	7.86e-12	0.00144126	824.806
T2DM	iRBD	rs6878122	G	A	0.0564	5	77131486	0.0079	0.328	1.19e-12	0.00140227	832.678
T2DM	iRBD	rs8068804	A	G	0.0587	17	4082570	0.0078	0.3211	4.41e-14	0.00150228	884.891
T2DM	iRBD	rs17168486	T	C	0.0742	7	14858657	0.0094	0.166	2.18e-15	0.00152445	904.138
T2DM	iRBD	rs6795735	T	C	-0.0558	3	64719689	0.0073	0.4354	1.63e-14	0.00153083	927.647
T2DM	iRBD	rs9894220	G	A	-0.0585	17	48911792	0.0079	0.3917	1.52e-13	0.00163085	937.142
T2DM	iRBD	rs243019	C	T	0.0566	2	60358671	0.0071	0.4483	2.29e-15	0.00158465	951.803
T2DM	iRBD	rs10974438	C	A	0.0591	9	4291928	0.0075	0.3837	3.01e-15	0.00165192	981.987
T2DM	iRBD	rs8108269	G	T	0.0644	19	45655255	0.0079	0.2952	3.11e-16	0.00172577	1045.29
T2DM	iRBD	rs7177055	G	A	-0.0647	15	77540420	0.0079	0.2972	2.75e-16	0.00174872	1059.91
T2DM	iRBD	rs61953351	T	G	-0.07	12	121018813	0.0091	0.2594	1.98e-14	0.00188269	1080.72
T2DM	iRBD	rs10842994	T	C	-0.0755	12	27812217	0.0091	0.2078	1.02e-16	0.00187674	1137.66
T2DM	iRBD	rs11257655	T	C	0.0737	10	12265895	0.0087	0.2266	1.97e-17	0.00190383	1139.67
T2DM	iRBD	rs340874	T	C	-0.0626	1	213985913	0.0073	0.4692	8.41e-18	0.00195195	1168.51
T2DM	iRBD	rs2261181	T	C	0.0985	12	65818538	0.0118	0.1173	9.18e-17	0.00200916	1209.86
T2DM	iRBD	rs1496653	G	A	-0.0769	3	23413299	0.0088	0.2217	2.57e-18	0.00204078	1236.08
T2DM	iRBD	rs459193	A	G	-0.0711	5	56510924	0.0083	0.2913	8.81e-18	0.00208724	1249.69
T2DM	iRBD	rs2191348	G	T	-0.0652	7	15024630	0.0073	0.492	3.44e-19	0.00212498	1265.49
T2DM	iRBD	rs5215	C	T	0.0678	11	17387083	0.0073	0.3529	2.09e-20	0.00209948	1272.96
T2DM	iRBD	rs1063355	T	G	-0.0709	6	32659937	0.0079	0.4046	3.72e-19	0.0024219	1377.26
T2DM	iRBD	rs780094	T	C	-0.0692	2	27518370	0.0074	0.4105	5.16e-21	0.0023176	1405.45
T2DM	iRBD	rs516946	T	C	-0.0824	8	41661730	0.0085	0.2306	3.16e-22	0.00240933	1461.27
T2DM	iRBD	rs2796441	A	G	-0.0715	9	81694033	0.0073	0.4155	1.96e-22	0.00248312	1498.85
T2DM	iRBD	rs1359790	A	G	-0.0796	13	80143021	0.008	0.2674	2.8e-23	0.00248247	1505.76
T2DM	iRBD	rs11651755	C	T	0.0741	17	37739849	0.0077	0.4831	8.98e-22	0.00274227	1532.83
T2DM	iRBD	rs13389219	T	C	-0.0722	2	164672366	0.0074	0.4354	2.11e-22	0.00256291	1534.75
T2DM	iRBD	rs11708067	G	A	-0.0965	3	123346931	0.0086	0.171	5.93e-29	0.00264019	1601.4
T2DM	iRBD	rs1899951	T	C	-0.1118	3	12353341	0.0109	0.1213	1.64e-24	0.0026645	1615.57
T2DM	iRBD	rs1552224	C	A	-0.1034	11	72722053	0.0101	0.1501	8.64e-25	0.00272784	1634.26
T2DM	iRBD	rs77258096	A	C	-0.1171	16	75209874	0.0134	0.1213	1.78e-18	0.00292311	1672
T2DM	iRBD	rs17334919	T	C	-0.1398	2	43480246	0.0128	0.08052	6.69e-28	0.00289395	1753.7
T2DM	iRBD	rs10830963	G	C	0.0909	11	92975544	0.008	0.2883	5.85e-30	0.00339078	2036.38
T2DM	iRBD	rs1801214	C	T	-0.0903	4	6301295	0.0074	0.3648	5.52e-34	0.00377895	2264.09
T2DM	iRBD	rs2972144	A	G	-0.0913	2	226236695	0.0075	0.3728	2.55e-34	0.0038981	2364.17
T2DM	iRBD	rs7923866	T	C	-0.0972	10	92722319	0.0074	0.3748	9.34e-40	0.00442773	2690.13
T2DM	iRBD	rs849135	G	A	0.0999	7	28156794	0.0072	0.497	1.04e-43	0.00498982	2995.24
T2DM	iRBD	rs7185735	G	A	0.1056	16	53788739	0.0073	0.4125	1.59e-47	0.00540492	3246.11
T2DM	iRBD	rs3802177	A	G	-0.1217	8	117172786	0.008	0.2833	2.32e-52	0.00601444	3606.83
T2DM	iRBD	rs7651090	G	A	0.1204	3	185795604	0.0076	0.3042	3.85e-57	0.00613658	3735.86
T2DM	iRBD	rs7756992	G	A	0.1297	6	20679478	0.0078	0.2813	6e-62	0.00680185	4143.66
T2DM	iRBD	rs10811661	C	T	-0.1569	9	22134095	0.0098	0.168	4.13e-58	0.0068819	4192.42
T2DM	iRBD	rs35011184	A	G	0.2796	10	112989975	0.0088	0.2584	1e-200	0.0299617	17154.7

## Sheet: S4
Supplementary Table S4: Excluded SNPs related to confounding factors in the MR analysis.
SNP	hg38_coordinates	effect allele	other allele	trait	ancestry	year	beta	se	pval	direction	sample size	n_studies	unit	dataset
rs13239186	chr7:117870567	C	T	Ever smoked	European	2017	-0.008501	0.001301	6.465e-11	-	336067	1	risk diff	Neale-B_UKBB_EUR_2017
rs13239186	chr7:117870567	C	T	Fed-up feelings	European	2017	-0.008383	0.001321	2.21e-10	-	330549	1	risk diff	Neale-B_UKBB_EUR_2017
rs13239186	chr7:117870567	C	T	Getting up in morning	European	2017	0.00918	0.002042	6.935e-06	+	336501	1	-	Neale-B_UKBB_EUR_2017
rs13239186	chr7:117870567	C	T	Miserableness	European	2017	-0.008568	0.001318	7.883e-11	-	331856	1	risk diff	Neale-B_UKBB_EUR_2017
rs13239186	chr7:117870567	C	T	Mood swings	European	2017	-0.006856	0.001341	3.188e-07	-	329428	1	risk diff	Neale-B_UKBB_EUR_2017
rs13239186	chr7:117870567	C	T	Neuroticism score	European	2017	-0.05701	0.00952	2.116e-09	-	274108	1	-	Neale-B_UKBB_EUR_2017
rs13239186	chr7:117870567	C	T	Self-reported diabetes	European	2017	-0.002296	0.0005168	8.897e-06	-	337159	1	risk diff	Neale-B_UKBB_EUR_2017
rs13239186	chr7:117870567	C	T	Worry too long after embarrassment	European	2017	-0.006033	0.001346	7.345e-06	-	323766	1	risk diff	Neale-B_UKBB_EUR_2017
rs13239186	chr7:117870567	C	T	Depressive symptoms	European	2016	-0.023	0.005	1.776e-06	-	180866	3	SD	SSGAC_DS_EUR_2016
rs13239186	chr7:117870567	C	T	Neuroticism	European	2016	-0.017	0.004	9.282e-06	-	170911	2	SD	SSGAC_Neuroticism_EUR_2016
rs13239186	chr7:117870567	C	T	Neuroticism	European	2018	-0.012	0.002	1.89e-06	-	168105	2	SD	SSGAC_Neuroticism_EUR_2018
rs8047587	chr16:53764710	G	T	Body mass index females	East Asian	2017	-0.0684	0.006513	8.444e-26	-	82438	3	IVNT	Akiyama-M_BMI-F_EAS_2017
rs8047587	chr16:53764710	G	T	Body mass index males	East Asian	2017	-0.07266	0.005943	2.244e-34	-	90992	3	IVNT	Akiyama-M_BMI-M_EAS_2017
rs8047587	chr16:53764710	G	T	Body mass index	East Asian	2017	-0.07025	0.00439	1.228e-57	-	173430	3	IVNT	Akiyama-M_BMI_EAS_2017
rs8047587	chr16:53764710	G	T	Type II diabetes	European	2015	-0.124	0.01262	1.4e-22	-	84780	23	log OR	DIAGRAM_T2D-METABO_EUR_2015
rs8047587	chr16:53764710	G	T	Type II diabetes	European	2017	-0.12	0.012	8.6e-23	-	159208	18	log OR	DIAGRAM_T2D_EUR_2017
rs8047587	chr16:53764710	G	T	Age at menarche	European	2017	0.03061	0.002497	1.543e-34	+	176008	1	-	Neale-B_UKBB_EUR_2017
rs8047587	chr16:53764710	G	T	Alcohol intake frequency	European	2017	-0.02116	0.003586	3.613e-09	-	336965	1	-	Neale-B_UKBB_EUR_2017
rs8047587	chr16:53764710	G	T	Arm fat mass left	European	2017	-0.05901	0.002401	2.69e-133	-	331164	1	IVNT	Neale-B_UKBB_EUR_2017
rs8047587	chr16:53764710	G	T	Arm fat mass right	European	2017	-0.05886	0.0024	1.126e-132	-	331226	1	IVNT	Neale-B_UKBB_EUR_2017
rs8047587	chr16:53764710	G	T	Arm fat percentage left	European	2017	-0.04033	0.001855	9.38e-105	-	331198	1	IVNT	Neale-B_UKBB_EUR_2017
rs8047587	chr16:53764710	G	T	Arm fat percentage right	European	2017	-0.03982	0.001863	2.729e-101	-	331249	1	IVNT	Neale-B_UKBB_EUR_2017
rs8047587	chr16:53764710	G	T	Arm fat-free mass left	European	2017	-0.03394	0.001558	3.337e-105	-	331159	1	IVNT	Neale-B_UKBB_EUR_2017
rs8047587	chr16:53764710	G	T	Arm fat-free mass right	European	2017	-0.03252	0.001527	1.276e-100	-	331221	1	IVNT	Neale-B_UKBB_EUR_2017
rs8047587	chr16:53764710	G	T	Arm predicted mass left	European	2017	-0.03349	0.001552	3.061e-103	-	331146	1	IVNT	Neale-B_UKBB_EUR_2017
rs8047587	chr16:53764710	G	T	Arm predicted mass right	European	2017	-0.03276	0.001521	8.349e-103	-	331216	1	IVNT	Neale-B_UKBB_EUR_2017
rs8047587	chr16:53764710	G	T	Average weekly beer plus cider intake	European	2017	0.01082	0.002023	8.854e-08	+	241447	1	-	Neale-B_UKBB_EUR_2017
rs8047587	chr16:53764710	G	T	Average weekly spirits intake	European	2017	-0.01235	0.002578	1.659e-06	-	240658	1	-	Neale-B_UKBB_EUR_2017
rs8047587	chr16:53764710	G	T	Basal metabolic rate	European	2017	-0.03826	0.001624	1.546e-122	-	331307	1	IVNT	Neale-B_UKBB_EUR_2017
rs8047587	chr16:53764710	G	T	Body fat percentage	European	2017	-0.03598	0.001879	1.042e-81	-	331117	1	IVNT	Neale-B_UKBB_EUR_2017
rs8047587	chr16:53764710	G	T	Body mass index	European	2017	-0.06601	0.002423	2.821e-163	-	336107	1	IVNT	Neale-B_UKBB_EUR_2017
rs8047587	chr16:53764710	G	T	Comparative body size at age 10	European	2017	-0.04409	0.001676	2.752e-152	-	331693	1	-	Neale-B_UKBB_EUR_2017
rs8047587	chr16:53764710	G	T	Comparative height size at age 10	European	2017	-0.008828	0.001674	1.328e-07	-	332021	1	-	Neale-B_UKBB_EUR_2017
rs8047587	chr16:53764710	G	T	Creatinine in urine	European	2017	-0.01157	0.002322	6.26e-07	-	327525	1	IVNT	Neale-B_UKBB_EUR_2017
rs8047587	chr16:53764710	G	T	Diabetes diagnosed by doctor	European	2017	-0.004728	0.0005256	2.352e-19	-	336473	1	risk diff	Neale-B_UKBB_EUR_2017
rs8047587	chr16:53764710	G	T	Getting up in morning	European	2017	-0.00915	0.001883	1.178e-06	-	336501	1	-	Neale-B_UKBB_EUR_2017
rs8047587	chr16:53764710	G	T	Heel bone mineral density	European	2017	-0.01721	0.003144	4.403e-08	-	194398	1	IVNT	Neale-B_UKBB_EUR_2017
rs8047587	chr16:53764710	G	T	Heel bone mineral density left	European	2017	-0.02081	0.004187	6.739e-07	-	106254	1	IVNT	Neale-B_UKBB_EUR_2017
rs8047587	chr16:53764710	G	T	Heel bone mineral density right	European	2017	-0.01926	0.004158	3.61e-06	-	106251	1	IVNT	Neale-B_UKBB_EUR_2017
rs8047587	chr16:53764710	G	T	Hip circumference	European	2017	-0.05571	0.002426	1.339e-116	-	336601	1	IVNT	Neale-B_UKBB_EUR_2017
rs8047587	chr16:53764710	G	T	Illnesses of father: diabetes	European	2017	-0.004152	0.0007635	5.388e-08	-	293407	1	risk diff	Neale-B_UKBB_EUR_2017
rs8047587	chr16:53764710	G	T	Illnesses of mother: diabetes	European	2017	-0.003638	0.0007346	7.328e-07	-	309953	1	risk diff	Neale-B_UKBB_EUR_2017
rs8047587	chr16:53764710	G	T	Illnesses of siblings: high blood pressure	European	2017	-0.005783	0.001117	2.229e-07	-	262361	1	risk diff	Neale-B_UKBB_EUR_2017
rs8047587	chr16:53764710	G	T	Illnesses of siblings: none of the above, group 1	European	2017	0.006144	0.001308	2.656e-06	+	262734	1	risk diff	Neale-B_UKBB_EUR_2017
rs8047587	chr16:53764710	G	T	Impedance of arm left	European	2017	0.03462	0.00173	5.711e-89	+	331292	1	IVNT	Neale-B_UKBB_EUR_2017
rs8047587	chr16:53764710	G	T	Impedance of arm right	European	2017	0.03463	0.001723	9.312e-90	+	331279	1	IVNT	Neale-B_UKBB_EUR_2017
rs8047587	chr16:53764710	G	T	Impedance of leg left	European	2017	0.05488	0.002233	3.516e-133	+	331296	1	IVNT	Neale-B_UKBB_EUR_2017
rs8047587	chr16:53764710	G	T	Impedance of leg right	European	2017	0.05249	0.002216	6.729e-124	+	331301	1	IVNT	Neale-B_UKBB_EUR_2017
rs8047587	chr16:53764710	G	T	Impedance of whole body	European	2017	0.04647	0.001868	1.653e-136	+	331284	1	IVNT	Neale-B_UKBB_EUR_2017
rs8047587	chr16:53764710	G	T	Leg fat mass left	European	2017	-0.04739	0.001936	3.303e-132	-	331275	1	IVNT	Neale-B_UKBB_EUR_2017
rs8047587	chr16:53764710	G	T	Leg fat mass right	European	2017	-0.04801	0.001958	1.376e-132	-	331293	1	IVNT	Neale-B_UKBB_EUR_2017
rs8047587	chr16:53764710	G	T	Leg fat percentage left	European	2017	-0.0292	0.001532	6.12e-81	-	331278	1	IVNT	Neale-B_UKBB_EUR_2017
rs8047587	chr16:53764710	G	T	Leg fat percentage right	European	2017	-0.02956	0.001552	8.001e-81	-	331296	1	IVNT	Neale-B_UKBB_EUR_2017
rs8047587	chr16:53764710	G	T	Leg fat-free mass left	European	2017	-0.03926	0.001613	1.019e-130	-	331258	1	IVNT	Neale-B_UKBB_EUR_2017
rs8047587	chr16:53764710	G	T	Leg fat-free mass right	European	2017	-0.03766	0.001613	1.525e-120	-	331285	1	IVNT	Neale-B_UKBB_EUR_2017
rs8047587	chr16:53764710	G	T	Leg predicted mass left	European	2017	-0.03891	0.001602	3.652e-130	-	331253	1	IVNT	Neale-B_UKBB_EUR_2017
rs8047587	chr16:53764710	G	T	Leg predicted mass right	European	2017	-0.03738	0.001602	2.383e-120	-	331285	1	IVNT	Neale-B_UKBB_EUR_2017
rs8047587	chr16:53764710	G	T	Medication for cholesterol, blood pressure or diabetes: blood pressure medication	European	2017	-0.006952	0.001571	9.693e-06	-	154702	1	risk diff	Neale-B_UKBB_EUR_2017
rs8047587	chr16:53764710	G	T	Medication for cholesterol, blood pressure or diabetes: cholesterol lowering medication	European	2017	-0.006842	0.001533	8.036e-06	-	154702	1	risk diff	Neale-B_UKBB_EUR_2017
rs8047587	chr16:53764710	G	T	Medication for cholesterol, blood pressure or diabetes: none of the above	European	2017	0.009102	0.001714	1.088e-07	+	154702	1	risk diff	Neale-B_UKBB_EUR_2017
rs8047587	chr16:53764710	G	T	Morning or evening person	European	2017	0.01926	0.002411	1.395e-15	+	301143	1	-	Neale-B_UKBB_EUR_2017
rs8047587	chr16:53764710	G	T	Number of treatments or medications taken	European	2017	-0.0104	0.001966	1.238e-07	-	337159	1	-	Neale-B_UKBB_EUR_2017
rs8047587	chr16:53764710	G	T	Overall health rating	European	2017	-0.008575	0.00178	1.463e-06	-	336020	1	-	Neale-B_UKBB_EUR_2017
rs8047587	chr16:53764710	G	T	Relative age of first facial hair	European	2017	0.009281	0.0016	6.673e-09	+	151113	1	-	Neale-B_UKBB_EUR_2017
rs8047587	chr16:53764710	G	T	Relative age voice broke	European	2017	0.006132	0.001194	2.794e-07	+	144645	1	-	Neale-B_UKBB_EUR_2017
rs8047587	chr16:53764710	G	T	Self-reported breast cancer	European	2017	0.001954	0.0003589	5.196e-08	+	337159	1	risk diff	Neale-B_UKBB_EUR_2017
rs8047587	chr16:53764710	G	T	Self-reported diabetes	European	2017	-0.003766	0.0004766	2.769e-15	-	337159	1	risk diff	Neale-B_UKBB_EUR_2017
rs8047587	chr16:53764710	G	T	Self-reported hypertension	European	2017	-0.007735	0.001076	6.42e-13	-	337159	1	risk diff	Neale-B_UKBB_EUR_2017
rs8047587	chr16:53764710	G	T	Sleep duration	European	2017	0.01076	0.001894	1.338e-08	+	335410	1	-	Neale-B_UKBB_EUR_2017
rs8047587	chr16:53764710	G	T	Snoring	European	2017	0.007059	0.001208	5.101e-09	+	314449	1	risk diff	Neale-B_UKBB_EUR_2017
rs8047587	chr16:53764710	G	T	Sodium in urine	European	2017	-0.0172	0.002387	5.88e-13	-	326831	1	IVNT	Neale-B_UKBB_EUR_2017
rs8047587	chr16:53764710	G	T	Treatment with bendroflumethiazide	European	2017	-0.002673	0.0005684	2.566e-06	-	337159	1	risk diff	Neale-B_UKBB_EUR_2017
rs8047587	chr16:53764710	G	T	Treatment with blood pressure medication	European	2017	-0.006853	0.001277	8.083e-08	-	180203	1	risk diff	Neale-B_UKBB_EUR_2017
rs8047587	chr16:53764710	G	T	Treatment with metformin	European	2017	-0.002864	0.0003826	7.172e-14	-	337159	1	risk diff	Neale-B_UKBB_EUR_2017
rs8047587	chr16:53764710	G	T	Treatment with simvastatin	European	2017	-0.003543	0.0007774	5.182e-06	-	337159	1	risk diff	Neale-B_UKBB_EUR_2017
rs8047587	chr16:53764710	G	T	Trunk fat mass	European	2017	-0.05366	0.002467	7.642e-105	-	331093	1	IVNT	Neale-B_UKBB_EUR_2017
rs8047587	chr16:53764710	G	T	Trunk fat percentage	European	2017	-0.0391	0.002252	1.857e-67	-	331113	1	IVNT	Neale-B_UKBB_EUR_2017
rs8047587	chr16:53764710	G	T	Trunk fat-free mass	European	2017	-0.02951	0.001544	2.069e-81	-	331030	1	IVNT	Neale-B_UKBB_EUR_2017
rs8047587	chr16:53764710	G	T	Trunk predicted mass	European	2017	-0.02939	0.001539	2.658e-81	-	330995	1	IVNT	Neale-B_UKBB_EUR_2017
rs8047587	chr16:53764710	G	T	Usual walking pace	European	2017	0.00984	0.001498	5.064e-11	+	335349	1	-	Neale-B_UKBB_EUR_2017
rs8047587	chr16:53764710	G	T	Vascular or heart problems diagnosed by doctor: high blood pressure	European	2017	-0.00756	0.00109	4.126e-12	-	336683	1	risk diff	Neale-B_UKBB_EUR_2017
rs8047587	chr16:53764710	G	T	Vascular or heart problems diagnosed by doctor: none of the above	European	2017	0.00773	0.00112	5.093e-12	+	336683	1	risk diff	Neale-B_UKBB_EUR_2017
rs8047587	chr16:53764710	G	T	Waist circumference	European	2017	-0.0522	0.00217	8.744e-128	-	336639	1	IVNT	Neale-B_UKBB_EUR_2017
rs8047587	chr16:53764710	G	T	Weight	European	2017	-0.05538	0.00214	1.709e-147	-	336227	1	IVNT	Neale-B_UKBB_EUR_2017
rs8047587	chr16:53764710	G	T	Whole body fat mass	European	2017	-0.05616	0.00239	6.078e-122	-	330762	1	IVNT	Neale-B_UKBB_EUR_2017
rs8047587	chr16:53764710	G	T	Whole body fat-free mass	European	2017	-0.03421	0.001549	6.071e-108	-	331291	1	IVNT	Neale-B_UKBB_EUR_2017
rs8047587	chr16:53764710	G	T	Whole body water mass	European	2017	-0.03456	0.001552	8.204e-110	-	331315	1	IVNT	Neale-B_UKBB_EUR_2017
rs34402524	chr4:105275672	G	T	Granulocyte count	European	2016	-0.02626	0.005363	9.725e-07	-	173480	2	IVNT	Astle-W_Blood-Cell-Traits_EUR_2016
rs34402524	chr4:105275672	G	T	Myeloid white cell count	European	2016	-0.02647	0.005375	8.454e-07	-	173480	2	IVNT	Astle-W_Blood-Cell-Traits_EUR_2016
rs34402524	chr4:105275672	G	T	Neutrophil count	European	2016	-0.02614	0.005348	1.023e-06	-	173480	2	IVNT	Astle-W_Blood-Cell-Traits_EUR_2016
rs34402524	chr4:105275672	G	T	Sum basophil neutrophil counts	European	2016	-0.02618	0.005358	1.026e-06	-	173480	2	IVNT	Astle-W_Blood-Cell-Traits_EUR_2016
rs34402524	chr4:105275672	G	T	Sum neutrophil eosinophil counts	European	2016	-0.02612	0.005354	1.071e-06	-	173480	2	IVNT	Astle-W_Blood-Cell-Traits_EUR_2016
rs34402524	chr4:105275672	G	T	Years of educational attainment in females	European	2016	0.024	0.005	2.166e-06	+	181443	62	years	SSGAC_EduYears-F_EUR_2016
rs34402524	chr4:105275672	G	T	Years of educational attainment	European	2016	0.022	0.004	8.809e-09	+	328917	64	years	SSGAC_EduYears_EUR_2016

## Sheet: S5
Supplementary Table S5: MR reults with T2DM as the exposure factor and iRBD as the outcome.
Exposure	Outcome	Method	nSNPs	beta	se	MR_pval	or	or_lci95	or_uci95	Q	Q_df	heterogeneity_pval	egger_intercept	egger_intercept_se	pleiotropy_pval	MR_PRESSO global test
T2DM	iRBD	Inverse variance weighted	110	0.173863	0.0725801	0.0165997	1.18989	1.03211	1.37179							0.624
T2DM	iRBD	Maximum likelihood	110	0.17541	0.0731049	0.0164208	1.19173	1.03265	1.37533	103.745	109	0.624175
T2DM	iRBD	Simple mode	110	0.565624	0.254372	0.028237	1.76055	1.06936	2.8985
T2DM	iRBD	Weighted mode	110	0.106975	0.167784	0.525087	1.11291	0.80101	1.54625
T2DM	iRBD	MR Egger	110	0.137222	0.175251	0.435337	1.14708	0.813614	1.61723	103.692	108	0.599318	0.00288947	0.0125795	0.818762
T2DM	iRBD	Weighted median	110	0.236439	0.108034	0.0286293	1.26673	1.025	1.56547
T2DM	iRBD	MR PRESSO	110	0.173863	0.0708088	0.015654	1.18989	1.0357	1.36704

## Sheet: S6
Supplementary Table S6: Leave_one_out analysis reults with T2DM as the exposure factor and iRBD as the outcome.
Exposure	outcome	SNP	beta	se	pval
T2DM	iRBD	rs10077431	0.172275	0.0726988	0.017802
T2DM	iRBD	rs10087241	0.166611	0.0727647	0.0220376
T2DM	iRBD	rs10100265	0.169524	0.0727692	0.019827
T2DM	iRBD	rs10114341	0.179647	0.0727238	0.0135013
T2DM	iRBD	rs10401969	0.16931	0.072786	0.0200115
T2DM	iRBD	rs1050226	0.178254	0.0727783	0.0143143
T2DM	iRBD	rs1061813	0.17765	0.0727284	0.0145798
T2DM	iRBD	rs1063355	0.173019	0.0729917	0.0177689
T2DM	iRBD	rs10740322	0.186671	0.0727529	0.0102933
T2DM	iRBD	rs10811661	0.171476	0.0735688	0.0197623
T2DM	iRBD	rs10830963	0.172214	0.0731002	0.0184795
T2DM	iRBD	rs10842994	0.173472	0.0728542	0.0172617
T2DM	iRBD	rs10974438	0.176177	0.0728406	0.0155778
T2DM	iRBD	rs11098676	0.180129	0.072759	0.0132979
T2DM	iRBD	rs11107116	0.169171	0.0727063	0.0199772
T2DM	iRBD	rs11257655	0.173287	0.0728963	0.0174461
T2DM	iRBD	rs1127655	0.172652	0.0727458	0.0176273
T2DM	iRBD	rs11651755	0.18697	0.0730188	0.0104499
T2DM	iRBD	rs11708067	0.16789	0.0730525	0.0215498
T2DM	iRBD	rs11925227	0.17183	0.0727137	0.0181228
T2DM	iRBD	rs11926707	0.175634	0.0727448	0.0157618
T2DM	iRBD	rs12088739	0.181989	0.0728116	0.0124386
T2DM	iRBD	rs12299509	0.171388	0.0727646	0.0185041
T2DM	iRBD	rs12617659	0.172723	0.0727447	0.0175789
T2DM	iRBD	rs12910825	0.161129	0.0727977	0.0268716
T2DM	iRBD	rs12945601	0.170699	0.0727701	0.0189899
T2DM	iRBD	rs12970134	0.168232	0.0727899	0.0208219
T2DM	iRBD	rs1333039	0.174338	0.0728074	0.0166429
T2DM	iRBD	rs13330951	0.179412	0.0727569	0.0136668
T2DM	iRBD	rs13389219	0.178435	0.0729913	0.0145009
T2DM	iRBD	rs1359790	0.164791	0.0730021	0.0239862
T2DM	iRBD	rs1496653	0.172583	0.0728964	0.017908
T2DM	iRBD	rs1552224	0.181142	0.073048	0.013147
T2DM	iRBD	rs16988333	0.178546	0.0727293	0.014091
T2DM	iRBD	rs17086692	0.171845	0.0727321	0.0181421
T2DM	iRBD	rs17168486	0.171295	0.0728436	0.0186955
T2DM	iRBD	rs17334919	0.160693	0.0731213	0.0279762
T2DM	iRBD	rs17405722	0.171935	0.0727522	0.018113
T2DM	iRBD	rs17411031	0.168852	0.0727149	0.0202268
T2DM	iRBD	rs1758632	0.179833	0.0727584	0.0134492
T2DM	iRBD	rs17631783	0.168392	0.0727293	0.0205952
T2DM	iRBD	rs17791483	0.168956	0.0727461	0.0202037
T2DM	iRBD	rs1801214	0.171389	0.0732254	0.0192543
T2DM	iRBD	rs1899951	0.172651	0.0729979	0.0180229
T2DM	iRBD	rs2191348	0.175972	0.072928	0.015824
T2DM	iRBD	rs2237892	0.168513	0.0727386	0.0205207
T2DM	iRBD	rs2246618	0.17008	0.0727716	0.0194301
T2DM	iRBD	rs2261181	0.167677	0.0729388	0.021512
T2DM	iRBD	rs2292662	0.175242	0.0727544	0.0160106
T2DM	iRBD	rs2294120	0.174345	0.0727422	0.016541
T2DM	iRBD	rs2296173	0.170479	0.0728294	0.0192423
T2DM	iRBD	rs2299383	0.170786	0.0727186	0.018845
T2DM	iRBD	rs243019	0.179225	0.0728414	0.013875
T2DM	iRBD	rs2493394	0.170096	0.072751	0.019384
T2DM	iRBD	rs2796441	0.168728	0.0729959	0.0208066
T2DM	iRBD	rs2820426	0.168254	0.0727951	0.0208143
T2DM	iRBD	rs2867125	0.186432	0.0727753	0.0104147
T2DM	iRBD	rs2908282	0.171726	0.0727395	0.0182336
T2DM	iRBD	rs2925979	0.175619	0.0727818	0.0158241
T2DM	iRBD	rs2972144	0.177701	0.073225	0.0152334
T2DM	iRBD	rs340874	0.180748	0.0729024	0.0131635
T2DM	iRBD	rs348330	0.179562	0.0727567	0.0135878
T2DM	iRBD	rs35011184	0.22266	0.0780693	0.0043433
T2DM	iRBD	rs3756784	0.175536	0.0727073	0.0157663
T2DM	iRBD	rs3802177	0.168101	0.0736343	0.0224354
T2DM	iRBD	rs459193	0.173137	0.0729055	0.0175578
T2DM	iRBD	rs4686471	0.168158	0.0728131	0.0209184
T2DM	iRBD	rs4823182	0.169863	0.0727646	0.0195742
T2DM	iRBD	rs4865796	0.180915	0.0727847	0.0129325
T2DM	iRBD	rs516946	0.178885	0.0730291	0.0143053
T2DM	iRBD	rs5215	0.153125	0.0729494	0.035812
T2DM	iRBD	rs576674	0.174178	0.0727889	0.0167147
T2DM	iRBD	rs61953351	0.171859	0.0728989	0.0183982
T2DM	iRBD	rs622217	0.188381	0.0727782	0.00964141
T2DM	iRBD	rs67232546	0.176937	0.0727787	0.0150506
T2DM	iRBD	rs6795735	0.176248	0.0728343	0.015527
T2DM	iRBD	rs6878122	0.179078	0.0728003	0.0138997
T2DM	iRBD	rs7138300	0.167512	0.0727497	0.0213026
T2DM	iRBD	rs7144011	0.176068	0.0727045	0.0154483
T2DM	iRBD	rs7177055	0.184988	0.0728892	0.011151
T2DM	iRBD	rs7185735	0.177977	0.0734574	0.0153987
T2DM	iRBD	rs7240767	0.182126	0.0727315	0.012277
T2DM	iRBD	rs72892910	0.17527	0.0727713	0.0160182
T2DM	iRBD	rs735949	0.167682	0.0727815	0.0212273
T2DM	iRBD	rs753270	0.179423	0.0728075	0.0137264
T2DM	iRBD	rs7561798	0.177076	0.0727051	0.0148699
T2DM	iRBD	rs7572970	0.172131	0.0728163	0.0180831
T2DM	iRBD	rs7651090	0.172178	0.0736601	0.019415
T2DM	iRBD	rs7674212	0.170879	0.0727505	0.0188321
T2DM	iRBD	rs7685296	0.170077	0.0727541	0.0194032
T2DM	iRBD	rs77258096	0.180189	0.0730451	0.0136321
T2DM	iRBD	rs7729395	0.179945	0.0727767	0.0134147
T2DM	iRBD	rs7756992	0.170445	0.0737888	0.0208936
T2DM	iRBD	rs780094	0.176113	0.0729801	0.0158149
T2DM	iRBD	rs7845219	0.169177	0.0727332	0.0200191
T2DM	iRBD	rs7923866	0.163215	0.0733375	0.0260453
T2DM	iRBD	rs7929543	0.170057	0.0727315	0.0193795
T2DM	iRBD	rs8068804	0.17532	0.0728418	0.0160901
T2DM	iRBD	rs8108269	0.165285	0.0728805	0.0233355
T2DM	iRBD	rs825476	0.169582	0.0728133	0.019859
T2DM	iRBD	rs840967	0.171965	0.0727743	0.0181283
T2DM	iRBD	rs849135	0.162377	0.0734032	0.0269584
T2DM	iRBD	rs853974	0.176691	0.0727933	0.015212
T2DM	iRBD	rs9369425	0.179171	0.0727784	0.0138215
T2DM	iRBD	rs963740	0.178125	0.0727502	0.0143472
T2DM	iRBD	rs982077	0.171764	0.0727469	0.0182199
T2DM	iRBD	rs9844972	0.171508	0.0727741	0.0184374
T2DM	iRBD	rs9894220	0.165253	0.072867	0.0233369
T2DM	iRBD	rs993380	0.17849	0.0727717	0.0141775
T2DM	iRBD	rs9940149	0.169155	0.0727413	0.0200492
T2DM	iRBD	All	0.173863	0.0725801	0.0165997

## Sheet: S7
Supplementary Table S7: Results of reverse MR analysis with iRBD as the expoure and T2DM as the outcome.
Supplementary Table S7-1: Harmonized data for reverse MR analysis with iRBD as the expoure and T2DM as the outcome.
Exposure	Outcome	SNP	effect_allele	other_allele	beta	chr	pos	se	pval	eaf	R2	F	FMean
iRBD	T2DM	rs113356890	C	G	0.376662	6	73407971	0.0818397	4.17586e-06	0.07853	0.0205329	197.999	313.146
iRBD	T2DM	rs11622216	C	A	0.254849	14	103051901	0.0515761	7.76351e-07	0.3052	0.0275448	267.53	313.146
iRBD	T2DM	rs16947905	A	G	0.491337	16	49761670	0.0916828	8.36404e-08	0.07853	0.0349386	341.942	313.146
iRBD	T2DM	rs360105	T	A	0.29846	4	189563252	0.0640479	3.16296e-06	0.174	0.0256054	248.198	313.146
iRBD	T2DM	rs4641471	T	C	0.275591	11	21283102	0.0565722	1.10757e-06	0.2306	0.0269508	261.601	313.146
iRBD	T2DM	rs4701532	A	G	0.248744	5	26231699	0.0532256	2.96261e-06	0.2674	0.0242417	234.651	313.146
iRBD	T2DM	rs7179187	C	T	0.223371	15	99168770	0.047717	2.85246e-06	0.494	0.0249437	241.62	313.146
iRBD	T2DM	rs7519408	G	C	0.328323	1	207661289	0.0683299	1.54778e-06	0.1362	0.0253643	245.8	313.146
Supplementary Table S7-2: All the MR results with iRBD as the expoure and T2DM as the outcome.
Exposure	id.outcome	method	nsnp	beta	se	MR_pval	or	or_lci95	or_uci95	Q	Q_df	Q_pval	egger_intercept	se	pleiotropy_pval	MR PRESSO_global test
iRBD	T2DM	Inverse variance weighted	8	0.00110332	0.0173825	0.94939	1.0011	0.967571	1.0358	13.5405	7	0.0599837				0.071
iRBD	T2DM	Maximum likelihood	8	0.00117847	0.0129493	0.927487	1.00118	0.976088	1.02691
iRBD	T2DM	Simple mode	8	0.0277882	0.0347074	0.449653	1.02818	0.960561	1.10056
iRBD	T2DM	Weighted mode	8	0.0265232	0.0348184	0.471085	1.02688	0.959137	1.0994
iRBD	T2DM	MR Egger	8	-0.0362344	0.0867589	0.69074	0.964414	0.813604	1.14318				0.0109387	0.0248343	0.675023
iRBD	T2DM	Weighted median	8	0.0169286	0.0192574	0.379363	1.01707	0.979399	1.0562
Supplementary Table S7-3: Leve_one_out results with iRBD as the expoure and T2DM as the outcome.
Exposure	Outcome	SNP	beta	se	pval
iRBD	T2DM	rs113356890	-0.00715887	0.0165985	0.666253
iRBD	T2DM	rs11622216	0.00913864	0.0181686	0.614972
iRBD	T2DM	rs16947905	0.0117044	0.0162563	0.471531
iRBD	T2DM	rs360105	-0.00189606	0.0197216	0.923408
iRBD	T2DM	rs4641471	-0.00398126	0.0194739	0.838009
iRBD	T2DM	rs4701532	0.00630554	0.0191478	0.741922
iRBD	T2DM	rs7179187	-0.00436102	0.0190516	0.818942
iRBD	T2DM	rs7519408	-0.000546547	0.0199311	0.978123
iRBD	T2DM	All	0.00110332	0.0173825	0.94939

## Sheet: S8
Supplementary Table S8: Harmonized data for forward MR analyses with three kinds of metabolic traits as the exposure factor and iRBD as the outcome.
Exposure	Outcome	SNP	effect_allele	other_allele	beta	se	chr	pos	pval	eaf	R2	F	F Mean
Blood glucose levels	iRBD	rs117420076	T	C	0.0328022	0.00581415	13	115093767	1.68283e-08	0.02684	5.62086e-05	20.1001	107.89
Blood glucose levels	iRBD	rs72764668	A	G	0.0177479	0.00321658	16	4243020	3.4359e-08	0.1322	7.22728e-05	25.845	107.89
Blood glucose levels	iRBD	rs57009615	G	A	0.019067	0.00340083	19	19613622	2.06395e-08	0.1153	7.41686e-05	26.523	107.89
Blood glucose levels	iRBD	rs7650482	G	A	-0.0132797	0.00240835	3	12841804	3.50744e-08	0.3141	7.59863e-05	27.1731	107.89
Blood glucose levels	iRBD	rs9273363	A	C	0.0140574	0.00249129	6	32626272	1.67498e-08	0.2624	7.64935e-05	27.3545	107.89
Blood glucose levels	iRBD	rs28483077	G	A	0.0176707	0.00307951	5	167934861	9.57172e-09	0.1431	7.65786e-05	27.3849	107.89
Blood glucose levels	iRBD	rs7895494	C	A	-0.0133637	0.00237728	10	89379732	1.89383e-08	0.3241	7.82429e-05	27.9801	107.89
Blood glucose levels	iRBD	rs10305423	T	C	-0.042917	0.00652597	6	39017062	4.8217e-11	0.02187	7.88014e-05	28.1799	107.89
Blood glucose levels	iRBD	rs139010077	T	C	-0.0604388	0.00994631	3	170336148	1.22829e-09	0.01093	7.89785e-05	28.2432	107.89
Blood glucose levels	iRBD	rs7031649	T	C	0.016462	0.00296341	9	3899901	2.77485e-08	0.1789	7.96162e-05	28.4713	107.89
Blood glucose levels	iRBD	rs139643	A	G	0.0128667	0.00230607	22	25231570	2.41207e-08	0.4394	8.15601e-05	29.1665	107.89
Blood glucose levels	iRBD	rs35895680	A	C	-0.0139733	0.00245876	17	47060322	1.32306e-08	0.2992	8.18811e-05	29.2813	107.89
Blood glucose levels	iRBD	rs6840504	T	C	0.0130622	0.00231299	4	18205102	1.62993e-08	0.4264	8.3462e-05	29.8467	107.89
Blood glucose levels	iRBD	rs1535464	A	G	-0.0158987	0.00265281	14	100793431	2.05816e-09	0.2107	8.40736e-05	30.0654	107.89
Blood glucose levels	iRBD	rs61211588	A	G	0.0314469	0.00487105	12	125585506	1.07585e-10	0.04473	8.45105e-05	30.2217	107.89
Blood glucose levels	iRBD	rs17350833	A	G	-0.0146828	0.00250385	13	46537757	4.51648e-09	0.2684	8.4665e-05	30.2769	107.89
Blood glucose levels	iRBD	rs11032966	T	C	0.0251189	0.00434801	11	35004623	7.59976e-09	0.07256	8.49208e-05	30.3684	107.89
Blood glucose levels	iRBD	rs6006399	G	T	-0.0230797	0.00357915	22	30598516	1.13058e-10	0.08748	8.50436e-05	30.4123	107.89
Blood glucose levels	iRBD	rs79467716	A	G	-0.0559599	0.00946269	2	169404334	3.34418e-09	0.01392	8.59677e-05	30.7428	107.89
Blood glucose levels	iRBD	rs993380	G	A	-0.0139625	0.00242695	4	83584496	8.76113e-09	0.3748	9.1364e-05	32.6727	107.89
Blood glucose levels	iRBD	rs62401198	T	C	0.0177784	0.00314972	6	43801654	1.65733e-08	0.1769	9.20441e-05	32.916	107.89
Blood glucose levels	iRBD	rs9873519	T	C	0.0136736	0.00230087	3	124921457	2.80156e-09	0.4592	9.28612e-05	33.2082	107.89
Blood glucose levels	iRBD	rs61289363	A	C	-0.0185507	0.00326455	17	67530333	1.32776e-08	0.161	9.29691e-05	33.2468	107.89
Blood glucose levels	iRBD	rs714549	G	A	-0.0144862	0.00242952	10	95389083	2.48279e-09	0.3479	9.52155e-05	34.0502	107.89
Blood glucose levels	iRBD	rs4977200	G	A	-0.0143092	0.00238495	8	145510507	1.97579e-09	0.3698	9.54346e-05	34.1286	107.89
Blood glucose levels	iRBD	rs4132537	G	A	0.0139074	0.00230019	3	100220307	1.48296e-09	0.4573	9.60026e-05	34.3317	107.89
Blood glucose levels	iRBD	rs8190647	T	C	-0.0185907	0.00299956	10	26520513	5.72545e-10	0.167	9.61575e-05	34.3871	107.89
Blood glucose levels	iRBD	rs78444298	A	G	0.0572342	0.00830213	1	184672098	5.4275e-12	0.01491	9.62265e-05	34.4118	107.89
Blood glucose levels	iRBD	rs10225744	C	T	0.0138955	0.00230613	7	89946003	1.68655e-09	0.4761	9.63219e-05	34.4459	107.89
Blood glucose levels	iRBD	rs12315434	C	A	-0.0182172	0.00272582	12	57780936	2.3383e-11	0.1859	0.00010045	35.9224	107.89
Blood glucose levels	iRBD	rs1175716	A	C	0.0148791	0.00232985	13	26904453	1.69973e-10	0.3966	0.00010596	37.8929	107.89
Blood glucose levels	iRBD	rs78959242	C	T	0.0524435	0.0080505	11	14522000	7.30298e-11	0.01988	0.000107179	38.3289	107.89
Blood glucose levels	iRBD	rs465983	G	A	-0.0166808	0.0026905	5	55812130	5.65093e-10	0.2634	0.000107972	38.6126	107.89
Blood glucose levels	iRBD	rs231848	G	A	0.0149171	0.00231324	11	2735557	1.12909e-10	0.4483	0.00011007	39.3631	107.89
Blood glucose levels	iRBD	rs11651755	T	C	-0.0149123	0.00229968	17	36099840	8.90225e-11	0.4831	0.000111061	39.7175	107.89
Blood glucose levels	iRBD	rs117892540	T	C	-0.0533938	0.00764957	7	44081629	2.95189e-12	0.01988	0.000111098	39.7307	107.89
Blood glucose levels	iRBD	rs6775569	G	A	-0.0152166	0.00234883	3	25387962	9.27257e-11	0.4036	0.000111469	39.8633	107.89
Blood glucose levels	iRBD	rs2848649	A	G	-0.022028	0.00341229	2	158519802	1.07875e-10	0.1342	0.000112759	40.3246	107.89
Blood glucose levels	iRBD	rs888955	A	G	0.0150838	0.00230499	5	148120128	5.99101e-11	0.4851	0.000113659	40.6468	107.89
Blood glucose levels	iRBD	rs11610045	A	G	0.0152529	0.00228768	12	133063768	2.60375e-11	0.4513	0.000115222	41.2056	107.89
Blood glucose levels	iRBD	rs7075575	G	A	0.016943	0.00250791	10	52643078	1.42037e-11	0.2823	0.000116323	41.5993	107.89
Blood glucose levels	iRBD	rs60330317	A	G	-0.0196314	0.0030437	1	3107547	1.11952e-10	0.1889	0.000118097	42.2339	107.89
Blood glucose levels	iRBD	rs114757976	T	C	-0.0393967	0.00612061	3	152527875	1.22073e-10	0.04076	0.00012137	43.4045	107.89
Blood glucose levels	iRBD	rs7501994	G	A	-0.0162644	0.00236564	17	17341469	6.18728e-12	0.3648	0.000122595	43.8425	107.89
Blood glucose levels	iRBD	rs10771370	G	A	-0.0194288	0.00287647	12	27960170	1.43417e-11	0.2078	0.00012428	44.4454	107.89
Blood glucose levels	iRBD	rs1513272	T	C	-0.0158219	0.00229342	7	28200097	5.24445e-12	0.498	0.000125164	44.7616	107.89
Blood glucose levels	iRBD	rs1359790	A	G	-0.0180214	0.00252679	13	80717156	9.88325e-13	0.2674	0.000127243	45.5052	107.89
Blood glucose levels	iRBD	rs10108430	T	C	-0.016187	0.0022882	8	95961794	1.50418e-12	0.4751	0.000130685	46.736	107.89
Blood glucose levels	iRBD	rs140655027	C	T	-0.076166	0.0122454	2	169855207	4.97279e-10	0.01193	0.000136767	48.9115	107.89
Blood glucose levels	iRBD	rs80097396	G	A	-0.0308127	0.00420747	6	7125529	2.4188e-13	0.07853	0.000137406	49.1402	107.89
Blood glucose levels	iRBD	rs348330	A	G	-0.0175933	0.00238667	1	229672955	1.68772e-13	0.3579	0.000142262	50.877	107.89
Blood glucose levels	iRBD	rs564449	G	T	0.0270307	0.00356654	7	100321138	3.48257e-14	0.1093	0.000142264	50.8779	107.89
Blood glucose levels	iRBD	rs718336	A	C	-0.0553637	0.00761772	7	44698972	3.65511e-13	0.02386	0.000142778	51.0617	107.89
Blood glucose levels	iRBD	rs4233315	A	G	-0.0170403	0.00231619	1	214095090	1.88062e-13	0.4692	0.000144635	51.7258	107.89
Blood glucose levels	iRBD	rs2800732	T	G	-0.0196611	0.00251644	6	127416475	5.58085e-15	0.2525	0.000145921	52.1858	107.89
Blood glucose levels	iRBD	rs12146652	A	C	-0.0179824	0.00235722	11	17384542	2.37192e-14	0.3598	0.000148971	53.2767	107.89
Blood glucose levels	iRBD	rs7129793	T	C	-0.0242899	0.00315675	11	72455885	1.41938e-14	0.1521	0.000152179	54.4242	107.89
Blood glucose levels	iRBD	rs830577	T	G	0.0234516	0.00319163	9	33288610	2.01419e-13	0.1769	0.000160161	57.279	107.89
Blood glucose levels	iRBD	rs1836996	T	C	0.0183997	0.0022916	15	62368895	9.8107e-16	0.4712	0.000168713	60.3382	107.89
Blood glucose levels	iRBD	rs7018475	G	T	0.0209224	0.00262633	9	22137685	1.6338e-15	0.2694	0.000172318	61.6277	107.89
Blood glucose levels	iRBD	rs7256920	A	G	-0.0186565	0.00230237	19	46203083	5.35427e-16	0.496	0.000174021	62.237	107.89
Blood glucose levels	iRBD	rs3842727	T	G	-0.0205364	0.00248355	11	2184848	1.35114e-16	0.2952	0.000175493	62.7636	107.89
Blood glucose levels	iRBD	rs9472135	C	T	0.0204027	0.00248815	6	43809802	2.40547e-16	0.3032	0.000175891	62.9057	107.89
Blood glucose levels	iRBD	rs6808574	C	T	0.0193926	0.0023585	3	187740523	1.99434e-16	0.3946	0.000179681	64.2614	107.89
Blood glucose levels	iRBD	rs113861493	G	A	-0.0480199	0.00553542	3	141128250	4.13523e-18	0.04175	0.000184505	65.9871	107.89
Blood glucose levels	iRBD	rs6976501	A	G	-0.0241218	0.0027558	7	50760220	2.07587e-18	0.2008	0.000186753	66.7914	107.89
Blood glucose levels	iRBD	rs7177055	A	G	0.0211646	0.00254441	15	77832762	8.93923e-17	0.2972	0.000187125	66.9241	107.89
Blood glucose levels	iRBD	rs116401167	C	T	-0.0289464	0.00333334	4	185715685	3.82384e-18	0.1322	0.000192252	68.7582	107.89
Blood glucose levels	iRBD	rs174577	A	C	-0.0204404	0.00239396	11	61604814	1.36176e-17	0.3608	0.000192713	68.9234	107.89
Blood glucose levels	iRBD	rs149290349	A	G	-0.0450951	0.00440242	2	43451957	1.26911e-24	0.05865	0.000224547	80.3112	107.89
Blood glucose levels	iRBD	rs11580608	T	C	0.0235829	0.00246453	1	118168234	1.08019e-21	0.2893	0.000228696	81.7955	107.89
Blood glucose levels	iRBD	rs721156	T	C	-0.0449353	0.00489954	12	97864143	4.67197e-20	0.06064	0.000230036	82.2749	107.89
Blood glucose levels	iRBD	rs2168101	A	C	-0.0235392	0.00254717	11	8255408	2.43445e-20	0.2952	0.000230566	82.4644	107.89
Blood glucose levels	iRBD	rs7732130	A	G	-0.0231882	0.00245727	5	76435004	3.85212e-21	0.328	0.000237032	84.7776	107.89
Blood glucose levels	iRBD	rs11257655	T	C	0.0273693	0.00281551	10	12307894	2.45527e-22	0.2266	0.000262556	93.9088	107.89
Blood glucose levels	iRBD	rs7766070	A	C	0.0257632	0.00259777	6	20686573	3.49543e-23	0.2803	0.000267796	95.7836	107.89
Blood glucose levels	iRBD	rs78588343	A	G	-0.0319837	0.00298118	6	7249460	7.47825e-27	0.1561	0.000269514	96.3983	107.89
Blood glucose levels	iRBD	rs9987289	G	A	-0.046764	0.00395821	8	9183358	3.28852e-32	0.0746	0.000301941	108	107.89
Blood glucose levels	iRBD	rs2519093	T	C	0.0318608	0.00295043	9	136141870	3.4906e-27	0.1849	0.000305979	109.445	107.89
Blood glucose levels	iRBD	rs17168486	T	C	0.0335183	0.0030367	7	14898282	2.51362e-28	0.166	0.000311077	111.269	107.89
Blood glucose levels	iRBD	rs10965247	G	A	-0.033692	0.00299926	9	22132729	2.79319e-29	0.17	0.00032034	114.583	107.89
Blood glucose levels	iRBD	rs11839569	G	A	0.034398	0.00306862	13	33560493	3.65932e-29	0.175	0.000341655	122.21	107.89
Blood glucose levels	iRBD	rs1820176	C	T	-0.0300539	0.00254067	5	95696585	2.76058e-32	0.2803	0.000364423	130.357	107.89
Blood glucose levels	iRBD	rs35889227	T	G	-0.029385	0.00237789	14	90055468	4.43098e-35	0.3926	0.000411819	147.318	107.89
Blood glucose levels	iRBD	rs76895963	G	T	-0.105912	0.00886877	12	4384844	7.14167e-33	0.02386	0.00052252	186.939	107.89
Blood glucose levels	iRBD	rs76323047	G	A	0.0554706	0.00356765	7	44185955	1.63531e-54	0.1193	0.000646583	231.353	107.89
Blood glucose levels	iRBD	rs1260326	C	T	0.0398646	0.00235599	2	27730940	3.17395e-64	0.4105	0.000769134	275.237	107.89
Blood glucose levels	iRBD	rs11708067	G	A	-0.0521612	0.00265881	3	123065778	1.07944e-85	0.171	0.000771393	276.046	107.89
Blood glucose levels	iRBD	rs9650069	T	C	-0.0482125	0.00249269	8	118204020	2.40049e-83	0.2813	0.000939868	336.392	107.89
Blood glucose levels	iRBD	rs7903146	T	C	0.0531955	0.00251958	10	114758349	6.06736e-99	0.3171	0.00122556	438.77	107.89
Blood glucose levels	iRBD	rs9873618	A	G	-0.0647386	0.00252604	3	170733076	7.34514e-145	0.2883	0.00171988	616.051	107.89
Blood glucose levels	iRBD	rs853770	C	T	-0.0676967	0.00253324	2	169749841	2.52348e-157	0.2942	0.00190322	681.848	107.89
Blood glucose levels	iRBD	rs730497	A	G	0.109775	0.00299951	7	44223721	1e-200	0.1769	0.00350927	1259.26	107.89
Blood glucose levels	iRBD	rs495714	T	C	0.0887479	0.002305	2	169779764	1e-200	0.4682	0.00392217	1408	107.89
Fasting insulin levels	iRBD	rs75179845	C	T	0.0216	0.0035	9	136132954	6.05e-11	0.07753	6.67e-05	10.0785	18.041
Fasting insulin levels	iRBD	rs3775380	G	A	0.0119	0.0018	4	89739808	1.48e-11	0.492	7.08e-05	10.6904	18.041
Fasting insulin levels	iRBD	rs73013411	A	C	-0.018	0.0032	6	164126233	2.08e-08	0.1252	7.1e-05	10.7183	18.041
Fasting insulin levels	iRBD	rs6855363	C	T	-0.0125	0.002	4	157670537	4.04e-08	0.3598	7.2e-05	10.8709	18.041
Fasting insulin levels	iRBD	rs7133378	A	G	-0.0127	0.002	12	124409502	6e-11	0.3499	7.34e-05	11.0816	18.041
Fasting insulin levels	iRBD	rs9884482	C	T	0.0125	0.0019	4	106081636	2.88e-11	0.4085	7.55e-05	11.4035	18.041
Fasting insulin levels	iRBD	rs62271373	A	T	0.0256	0.0048	3	150066540	1.6e-08	0.06163	7.58e-05	11.4477	18.041
Fasting insulin levels	iRBD	rs10865959	C	G	0.0138	0.0022	3	49891002	1.99e-08	0.3082	8.12e-05	12.2644	18.041
Fasting insulin levels	iRBD	rs6487237	A	C	0.0154	0.0026	12	21699928	4.68e-09	0.2286	8.36e-05	12.632	18.041
Fasting insulin levels	iRBD	rs118164457	C	T	0.0345	0.0057	10	89680631	3.86e-10	0.03777	8.65e-05	13.0659	18.041
Fasting insulin levels	iRBD	rs860598	A	G	0.0177	0.0025	12	102898446	6.88e-12	0.174	9.01e-05	13.6005	18.041
Fasting insulin levels	iRBD	rs12454712	C	T	-0.0142	0.0025	18	60845884	1.78e-09	0.3857	9.56e-05	14.4307	18.041
Fasting insulin levels	iRBD	rs17036126	T	C	0.0209	0.003	3	12287863	1.28e-10	0.1262	9.63e-05	14.5494	18.041
Fasting insulin levels	iRBD	rs116141873	T	G	0.0428	0.0059	6	34222201	1.42e-11	0.02982	0.000105993	16.0078	18.041
Fasting insulin levels	iRBD	rs1474696	G	A	0.0147	0.0018	6	127449246	3.02e-16	0.4841	0.000107936	16.3012	18.041
Fasting insulin levels	iRBD	rs4865796	A	G	0.0165	0.002	5	53272664	7.33e-17	0.3032	0.000115036	17.3738	18.041
Fasting insulin levels	iRBD	rs459193	G	A	0.0181	0.0021	5	55806751	1.12e-18	0.2913	0.000135266	20.4295	18.041
Fasting insulin levels	iRBD	rs35000407	G	T	-0.0258	0.0028	3	12351521	1.5e-21	0.1193	0.000139874	21.1255	18.041
Fasting insulin levels	iRBD	rs13389219	T	C	-0.0199	0.0019	2	165528876	5.84e-28	0.4354	0.0001947	29.4075	18.041
Fasting insulin levels	iRBD	rs7012814	A	G	-0.0219	0.0019	8	9173358	8.34e-30	0.4742	0.000239167	36.1254	18.041
Fasting insulin levels	iRBD	rs1260326	C	T	0.0231	0.0019	2	27730940	8.42e-38	0.4105	0.000258256	39.0096	18.041
Fasting insulin levels	iRBD	rs2943646	G	A	0.025	0.0019	2	227099534	8.47e-39	0.3757	0.000293187	44.2874	18.041
Glycated haemoglobin levels	iRBD	rs79514927	G	A	0.027499	0.0049639	6	86303762	3.03e-08	0.03579	5.22e-05	20.3497	297
Glycated haemoglobin levels	iRBD	rs10401969	C	T	0.0208494	0.00378856	19	19407718	3.73e-08	0.07058	5.7e-05	22.2369	297
Glycated haemoglobin levels	iRBD	rs58310247	T	G	0.0134438	0.00245591	1	171944008	4.4e-08	0.1978	5.74e-05	22.3639	297
Glycated haemoglobin levels	iRBD	rs41295942	T	C	-0.0374642	0.00584719	7	100218631	1.48e-10	0.02087	5.74e-05	22.3661	297
Glycated haemoglobin levels	iRBD	rs141192775	T	C	-0.0386039	0.00608895	17	4815412	2.3e-10	0.01988	5.81e-05	22.6439	297
Glycated haemoglobin levels	iRBD	rs61963209	A	G	-0.0138571	0.00250666	13	41502588	3.24e-08	0.1918	5.95e-05	23.2117	297
Glycated haemoglobin levels	iRBD	rs62466318	T	C	0.0138074	0.0025068	7	73042085	3.63e-08	0.1958	6e-05	23.4097	297
Glycated haemoglobin levels	iRBD	rs62585575	T	C	0.0240338	0.00432856	9	131647894	2.82e-08	0.05567	6.07e-05	23.6802	297
Glycated haemoglobin levels	iRBD	rs34831382	G	A	-0.0187656	0.00340943	2	218672782	3.71e-08	0.09543	6.08e-05	23.7054	297
Glycated haemoglobin levels	iRBD	rs72683923	C	T	-0.048946	0.00719141	14	50735947	1e-11	0.01292	6.11e-05	23.8256	297
Glycated haemoglobin levels	iRBD	rs6583177	G	T	0.0111691	0.00201353	3	196549742	2.91e-08	0.4732	6.22e-05	24.2506	297
Glycated haemoglobin levels	iRBD	rs117276569	T	C	-0.0424885	0.00747736	17	76171962	1.33e-08	0.01789	6.34e-05	24.7349	297
Glycated haemoglobin levels	iRBD	rs13248311	A	C	-0.0114319	0.00207588	8	129070559	3.65e-08	0.4185	6.36e-05	24.8015	297
Glycated haemoglobin levels	iRBD	rs72753548	T	C	0.0128478	0.00228892	9	100670802	1.99e-08	0.2614	6.37e-05	24.8524	297
Glycated haemoglobin levels	iRBD	rs7126413	G	A	0.0116386	0.00208086	11	120207405	2.23e-08	0.3787	6.37e-05	24.8539	297
Glycated haemoglobin levels	iRBD	rs57891429	C	T	0.0176342	0.00299277	17	62181990	3.81e-09	0.1163	6.39e-05	24.9226	297
Glycated haemoglobin levels	iRBD	rs4382717	T	C	-0.0115337	0.00210838	1	154518610	4.49e-08	0.4026	6.4e-05	24.9501	297
Glycated haemoglobin levels	iRBD	rs17419291	C	T	-0.0198568	0.00356561	5	87780432	2.56e-08	0.08946	6.42e-05	25.0463	297
Glycated haemoglobin levels	iRBD	rs6844176	C	T	0.0114719	0.00203064	4	39366590	1.61e-08	0.4354	6.47e-05	25.2288	297
Glycated haemoglobin levels	iRBD	rs9494600	C	T	-0.0116995	0.00210835	6	137241328	2.87e-08	0.3857	6.49e-05	25.2907	297
Glycated haemoglobin levels	iRBD	rs147558893	C	T	0.0430099	0.00669931	9	135853085	1.36e-10	0.01789	6.5e-05	25.3457	297
Glycated haemoglobin levels	iRBD	rs35958372	C	T	-0.0139526	0.0024904	2	98330858	2.11e-08	0.2137	6.54e-05	25.5094	297
Glycated haemoglobin levels	iRBD	rs16873415	G	A	-0.0114766	0.00205786	8	106591802	2.45e-08	0.4632	6.55e-05	25.5391	297
Glycated haemoglobin levels	iRBD	rs2920880	T	C	0.0118554	0.00206035	2	55297818	8.71e-09	0.3698	6.55e-05	25.5432	297
Glycated haemoglobin levels	iRBD	rs72765381	C	T	-0.015664	0.00285758	10	3582729	4.22e-08	0.161	6.63e-05	25.8458	297
Glycated haemoglobin levels	iRBD	rs10916610	T	C	-0.0121415	0.00221652	1	224578928	4.31e-08	0.3439	6.65e-05	25.9385	297
Glycated haemoglobin levels	iRBD	rs11258437	T	C	0.0116713	0.00204275	10	13569805	1.11e-08	0.4284	6.67e-05	26.0122	297
Glycated haemoglobin levels	iRBD	rs9314323	G	A	0.012545	0.00220838	8	26243136	1.34e-08	0.3141	6.78e-05	26.4404	297
Glycated haemoglobin levels	iRBD	rs11149059	C	T	-0.014047	0.00240381	13	24877445	5.11e-09	0.2237	6.85e-05	26.7215	297
Glycated haemoglobin levels	iRBD	rs113902512	A	G	-0.015459	0.00270852	2	112271208	1.15e-08	0.174	6.87e-05	26.7849	297
Glycated haemoglobin levels	iRBD	rs6584535	C	T	0.0139674	0.00248288	10	104734612	1.85e-08	0.2286	6.88e-05	26.8278	297
Glycated haemoglobin levels	iRBD	rs62036942	C	T	0.0168371	0.00291534	16	4012480	7.68e-09	0.1421	6.91e-05	26.9503	297
Glycated haemoglobin levels	iRBD	rs6445826	C	T	0.0117696	0.0020567	3	56848999	1.05e-08	0.498	6.93e-05	27.0057	297
Glycated haemoglobin levels	iRBD	rs34079969	A	C	0.0172871	0.00312286	13	95986038	3.1e-08	0.1342	6.94e-05	27.0778	297
Glycated haemoglobin levels	iRBD	rs6720896	C	T	-0.0129545	0.00226724	2	234086584	1.1e-08	0.2942	6.97e-05	27.1747	297
Glycated haemoglobin levels	iRBD	rs8887	C	T	-0.0118621	0.00205316	19	4502201	7.58e-09	0.4583	6.99e-05	27.2415	297
Glycated haemoglobin levels	iRBD	rs12040433	G	A	-0.0125661	0.00212882	1	53232766	3.57e-09	0.335	7.04e-05	27.4326	297
Glycated haemoglobin levels	iRBD	rs13383320	A	C	-0.0120832	0.00205916	2	65645137	4.41e-09	0.4076	7.05e-05	27.4924	297
Glycated haemoglobin levels	iRBD	rs10890181	T	C	0.011937	0.00202097	1	42563219	3.49e-09	0.4493	7.05e-05	27.4942	297
Glycated haemoglobin levels	iRBD	rs12650788	A	G	0.0122003	0.00207219	4	153813812	3.92e-09	0.3897	7.08e-05	27.6067	297
Glycated haemoglobin levels	iRBD	rs1774217	G	A	0.0119074	0.00203482	10	30241679	4.86e-09	0.497	7.09e-05	27.6413	297
Glycated haemoglobin levels	iRBD	rs1259180	C	T	-0.0120802	0.00206154	15	83244680	4.63e-09	0.4175	7.1e-05	27.6758	297
Glycated haemoglobin levels	iRBD	rs74857652	T	C	0.0335039	0.00547278	8	42360893	9.25e-10	0.0328	7.12e-05	27.7703	297
Glycated haemoglobin levels	iRBD	rs2959356	G	A	0.0133908	0.00219635	18	23590203	1.08e-09	0.2763	7.17e-05	27.961	297
Glycated haemoglobin levels	iRBD	rs10886280	T	C	-0.0131542	0.00219083	10	120424177	1.92e-09	0.2942	7.19e-05	28.019	297
Glycated haemoglobin levels	iRBD	rs2771425	G	A	-0.0126292	0.00207547	6	158896776	1.17e-09	0.3549	7.3e-05	28.4764	297
Glycated haemoglobin levels	iRBD	rs11166447	C	T	-0.0128232	0.00210981	1	100875628	1.22e-09	0.333	7.3e-05	28.4815	297
Glycated haemoglobin levels	iRBD	rs76827930	C	T	0.0257236	0.00442529	1	108583161	6.14e-09	0.05865	7.31e-05	28.4894	297
Glycated haemoglobin levels	iRBD	rs10888260	C	T	0.0204907	0.00329401	1	248014871	4.95e-10	0.0964	7.31e-05	28.5212	297
Glycated haemoglobin levels	iRBD	rs115730158	A	G	0.0249671	0.00424996	5	34656475	4.24e-09	0.06262	7.32e-05	28.5342	297
Glycated haemoglobin levels	iRBD	rs117783723	C	T	0.0237338	0.00433483	14	51095429	4.37e-08	0.07058	7.39e-05	28.8157	297
Glycated haemoglobin levels	iRBD	rs7564145	T	C	-0.0197145	0.0034977	2	175244482	1.74e-08	0.1064	7.39e-05	28.8176	297
Glycated haemoglobin levels	iRBD	rs113582976	T	G	-0.0146906	0.00259927	3	52198853	1.59e-08	0.2207	7.42e-05	28.9459	297
Glycated haemoglobin levels	iRBD	rs76413056	A	G	0.0283562	0.00495327	18	20057268	1.04e-08	0.04871	7.45e-05	29.0555	297
Glycated haemoglobin levels	iRBD	rs7798364	A	G	-0.0146572	0.00247853	7	107075394	3.35e-09	0.2237	7.46e-05	29.0937	297
Glycated haemoglobin levels	iRBD	rs1707731	C	T	-0.0128809	0.0021436	12	123920075	1.87e-09	0.3429	7.48e-05	29.1536	297
Glycated haemoglobin levels	iRBD	rs9398642	T	C	-0.017878	0.0028576	6	121883200	3.94e-10	0.1362	7.52e-05	29.3244	297
Glycated haemoglobin levels	iRBD	rs255154	C	T	0.0124253	0.00203823	7	30763042	1.09e-09	0.4235	7.54e-05	29.3946	297
Glycated haemoglobin levels	iRBD	rs11762803	G	A	-0.0143186	0.00240717	7	1886805	2.71e-09	0.2435	7.55e-05	29.4517	297
Glycated haemoglobin levels	iRBD	rs2546197	G	T	0.0218271	0.00376875	5	95172281	6.97e-09	0.08748	7.61e-05	29.6582	297
Glycated haemoglobin levels	iRBD	rs8006908	G	A	0.0124285	0.00202166	14	35424436	7.86e-10	0.4453	7.63e-05	29.7543	297
Glycated haemoglobin levels	iRBD	rs10910045	G	A	-0.0124456	0.00205592	1	2205527	1.42e-09	0.4503	7.67e-05	29.8993	297
Glycated haemoglobin levels	iRBD	rs72973028	C	A	0.017048	0.00267828	19	3341451	1.95e-10	0.1571	7.7e-05	30.0124	297
Glycated haemoglobin levels	iRBD	rs4945829	C	T	0.0129739	0.00213429	6	109638828	1.21e-09	0.3569	7.73e-05	30.1279	297
Glycated haemoglobin levels	iRBD	rs45607834	T	C	0.0211826	0.00332082	19	55693286	1.79e-10	0.09543	7.75e-05	30.2056	297
Glycated haemoglobin levels	iRBD	rs35678857	A	C	-0.0129703	0.00210975	13	95222890	7.86e-10	0.3608	7.76e-05	30.2556	297
Glycated haemoglobin levels	iRBD	rs4509	A	G	-0.0131769	0.00210446	22	35694209	3.81e-10	0.3419	7.81e-05	30.4663	297
Glycated haemoglobin levels	iRBD	rs1965794	T	G	-0.0209167	0.00349563	15	44150466	2.18e-09	0.0994	7.83e-05	30.5427	297
Glycated haemoglobin levels	iRBD	rs13170854	C	A	-0.0129472	0.00213227	5	52012952	1.26e-09	0.3777	7.88e-05	30.7257	297
Glycated haemoglobin levels	iRBD	rs2927328	C	T	-0.0132844	0.00212649	16	81509722	4.18e-10	0.339	7.91e-05	30.8381	297
Glycated haemoglobin levels	iRBD	rs1427297	T	C	-0.0137043	0.00216364	2	145227458	2.39e-10	0.3062	7.98e-05	31.1141	297
Glycated haemoglobin levels	iRBD	rs2292662	T	C	-0.0168362	0.00283794	3	63897215	2.98e-09	0.17	8e-05	31.1902	297
Glycated haemoglobin levels	iRBD	rs2267716	C	T	-0.0147884	0.00238411	7	30716643	5.54e-10	0.2425	8.03e-05	31.3286	297
Glycated haemoglobin levels	iRBD	rs10841891	G	T	-0.0146576	0.00237554	12	21878493	6.82e-10	0.2505	8.07e-05	31.4564	297
Glycated haemoglobin levels	iRBD	rs145173553	T	G	0.0127291	0.00206752	12	133813738	7.43e-10	0.497	8.1e-05	31.5881	297
Glycated haemoglobin levels	iRBD	rs9479509	A	G	0.0138715	0.00222695	6	153427265	4.7e-10	0.3032	8.13e-05	31.7021	297
Glycated haemoglobin levels	iRBD	rs9323450	G	A	0.0133268	0.00212093	14	64927967	3.31e-10	0.3549	8.13e-05	31.7095	297
Glycated haemoglobin levels	iRBD	rs35895680	A	C	-0.0139365	0.00216797	17	47060322	1.29e-10	0.2992	8.15e-05	31.759	297
Glycated haemoglobin levels	iRBD	rs56395926	A	G	-0.0148805	0.00240015	5	34507418	5.65e-10	0.2435	8.16e-05	31.8088	297
Glycated haemoglobin levels	iRBD	rs3731197	T	C	0.013221	0.00207945	9	21991371	2.04e-10	0.3728	8.17e-05	31.8724	297
Glycated haemoglobin levels	iRBD	rs148407308	T	C	0.0286737	0.00471651	17	40565200	1.21e-09	0.05268	8.21e-05	31.9974	297
Glycated haemoglobin levels	iRBD	rs60426421	A	G	-0.0173832	0.00271031	21	46321947	1.42e-10	0.163	8.25e-05	32.1497	297
Glycated haemoglobin levels	iRBD	rs2796441	A	G	-0.0130633	0.00203522	9	84308948	1.38e-10	0.4155	8.29e-05	32.3196	297
Glycated haemoglobin levels	iRBD	rs57060554	G	A	-0.0146541	0.00230328	5	132403887	1.99e-10	0.2614	8.29e-05	32.3324	297
Glycated haemoglobin levels	iRBD	rs7195055	T	C	-0.053498	0.00844005	16	88816310	2.32e-10	0.01491	8.41e-05	32.7819	297
Glycated haemoglobin levels	iRBD	rs138599549	T	G	-0.0597289	0.00943705	12	48479370	2.46e-10	0.01193	8.41e-05	32.7946	297
Glycated haemoglobin levels	iRBD	rs62132522	C	T	-0.0130881	0.00204916	2	37079583	1.69e-10	0.4334	8.41e-05	32.8038	297
Glycated haemoglobin levels	iRBD	rs57625745	C	T	0.0192169	0.00283691	3	170357332	1.25e-11	0.1312	8.42e-05	32.8266	297
Glycated haemoglobin levels	iRBD	rs147208676	T	C	0.023805	0.00370058	11	34782989	1.25e-10	0.08151	8.48e-05	33.0847	297
Glycated haemoglobin levels	iRBD	rs57787629	C	T	0.0148323	0.0022233	18	45551909	2.54e-11	0.2614	8.49e-05	33.1236	297
Glycated haemoglobin levels	iRBD	rs11917973	T	C	-0.0132233	0.00203189	3	195838613	7.62e-11	0.4195	8.52e-05	33.2062	297
Glycated haemoglobin levels	iRBD	rs9320429	G	T	0.0133083	0.00207263	6	113408826	1.35e-10	0.4066	8.55e-05	33.3247	297
Glycated haemoglobin levels	iRBD	rs4687680	A	G	0.0135525	0.00210694	3	52907372	1.26e-10	0.3767	8.63e-05	33.6308	297
Glycated haemoglobin levels	iRBD	rs13059110	T	G	0.0201013	0.00299203	3	137997742	1.84e-11	0.1223	8.67e-05	33.8242	297
Glycated haemoglobin levels	iRBD	rs1562397	A	G	0.0139737	0.00217374	7	130457926	1.29e-10	0.336	8.71e-05	33.9732	297
Glycated haemoglobin levels	iRBD	rs12645001	A	G	-0.0138006	0.00211376	4	96018337	6.62e-11	0.3628	8.81e-05	34.3357	297
Glycated haemoglobin levels	iRBD	rs797399	G	A	-0.0151038	0.00228418	1	29176897	3.78e-11	0.2674	8.94e-05	34.8504	297
Glycated haemoglobin levels	iRBD	rs2726032	C	T	0.013888	0.00203372	16	28338043	8.56e-12	0.3668	8.96e-05	34.9347	297
Glycated haemoglobin levels	iRBD	rs112750178	C	T	0.0163921	0.00237898	1	26859695	5.56e-12	0.2127	9e-05	35.0901	297
Glycated haemoglobin levels	iRBD	rs71603867	T	C	0.0225533	0.00312771	5	167965132	5.56e-13	0.09841	9.03e-05	35.1946	297
Glycated haemoglobin levels	iRBD	rs1705263	A	C	-0.0137123	0.00203065	12	71523043	1.45e-11	0.4364	9.25e-05	36.0649	297
Glycated haemoglobin levels	iRBD	rs2073040	G	A	0.0144214	0.00210859	6	53134998	7.96e-12	0.337	9.29e-05	36.2383	297
Glycated haemoglobin levels	iRBD	rs112784971	T	C	0.030315	0.00486047	8	59406490	4.46e-10	0.05368	9.34e-05	36.4062	297
Glycated haemoglobin levels	iRBD	rs147730268	T	G	-0.0267951	0.00362783	12	123024476	1.51e-13	0.07058	9.42e-05	36.7294	297
Glycated haemoglobin levels	iRBD	rs4261754	T	C	-0.0150372	0.0022417	2	68909258	1.97e-11	0.2992	9.48e-05	36.9743	297
Glycated haemoglobin levels	iRBD	rs4808072	C	T	0.013911	0.00204152	19	17301880	9.49e-12	0.4314	9.49e-05	37.0181	297
Glycated haemoglobin levels	iRBD	rs56777435	G	A	0.0355158	0.00598222	6	25794135	2.9e-09	0.03976	9.63e-05	37.5561	297
Glycated haemoglobin levels	iRBD	rs72814215	A	G	-0.0598059	0.00972405	10	70998703	7.73e-10	0.01392	9.82e-05	38.287	297
Glycated haemoglobin levels	iRBD	rs4947490	G	A	0.0153843	0.00215947	7	55160538	1.05e-12	0.3101	0.000101268	39.4872	297
Glycated haemoglobin levels	iRBD	rs112270735	G	A	0.0204152	0.0028794	1	155198771	1.34e-12	0.1421	0.000101617	39.6233	297
Glycated haemoglobin levels	iRBD	rs1154514	T	C	0.0143369	0.00201171	12	122374888	1.03e-12	0.4642	0.000102246	39.8686	297
Glycated haemoglobin levels	iRBD	rs7306544	C	T	0.021682	0.00331484	12	132439381	6.12e-11	0.1243	0.000102342	39.906	297
Glycated haemoglobin levels	iRBD	rs1531583	T	G	0.0350446	0.00520152	4	744972	1.61e-11	0.04473	0.000104954	40.9243	297
Glycated haemoglobin levels	iRBD	rs3741414	T	C	-0.0184069	0.00234019	12	57844049	3.67e-15	0.1948	0.000106288	41.4447	297
Glycated haemoglobin levels	iRBD	rs142235947	A	G	-0.0622784	0.00935154	7	44783443	2.74e-11	0.01392	0.000106477	41.5185	297
Glycated haemoglobin levels	iRBD	rs9892222	C	T	0.0299024	0.00377624	17	57373266	2.4e-15	0.06362	0.000106534	41.5406	297
Glycated haemoglobin levels	iRBD	rs1166698	A	G	-0.0179054	0.0024648	1	78392446	3.74e-13	0.2107	0.000106636	41.5805	297
Glycated haemoglobin levels	iRBD	rs11786992	C	A	-0.0153338	0.00208461	8	95685147	1.9e-13	0.3509	0.000107109	41.7647	297
Glycated haemoglobin levels	iRBD	rs59034241	T	G	0.0146718	0.00203812	17	66394038	6.08e-13	0.4652	0.000107109	41.7651	297
Glycated haemoglobin levels	iRBD	rs2793003	C	T	0.020276	0.00286477	9	125656046	1.47e-12	0.1541	0.000107181	41.7928	297
Glycated haemoglobin levels	iRBD	rs636089	C	T	0.0155065	0.00207298	8	103077790	7.41e-14	0.34	0.000107915	42.0791	297
Glycated haemoglobin levels	iRBD	rs8176059	A	G	-0.068265	0.0095452	7	142651354	8.57e-13	0.01193	0.000109864	42.8391	297
Glycated haemoglobin levels	iRBD	rs2060985	G	A	-0.0150009	0.00201968	8	131024701	1.11e-13	0.4483	0.000111311	43.4034	297
Glycated haemoglobin levels	iRBD	rs4238013	T	C	-0.0187431	0.00253132	12	4376089	1.32e-13	0.1978	0.000111486	43.4719	297
Glycated haemoglobin levels	iRBD	rs79221399	A	C	-0.0314014	0.00367992	22	32368918	1.42e-17	0.06064	0.000112336	43.8033	297
Glycated haemoglobin levels	iRBD	rs9423289	T	C	0.0153272	0.00206213	10	124704695	1.06e-13	0.3956	0.000112341	43.805	297
Glycated haemoglobin levels	iRBD	rs13192435	C	T	0.047347	0.0064207	6	7218337	1.65e-13	0.02584	0.000112859	44.0074	297
Glycated haemoglobin levels	iRBD	rs144155527	T	C	-0.0475995	0.00753619	10	114737633	2.68e-10	0.02584	0.000114066	44.4781	297
Glycated haemoglobin levels	iRBD	rs603923	A	G	0.0215453	0.00317673	11	55373973	1.18e-11	0.1441	0.000114504	44.6489	297
Glycated haemoglobin levels	iRBD	rs6045615	C	A	-0.0158042	0.0021629	20	1931582	2.73e-13	0.3588	0.000114927	44.8136	297
Glycated haemoglobin levels	iRBD	rs144993543	C	T	0.0732689	0.010801	6	27866635	1.17e-11	0.01093	0.000116069	45.2591	297
Glycated haemoglobin levels	iRBD	rs11120149	T	G	-0.0169552	0.00226627	1	213702536	7.34e-14	0.2833	0.00011674	45.5207	297
Glycated haemoglobin levels	iRBD	rs17561351	G	A	0.0321246	0.00414271	19	45372329	8.87e-15	0.06064	0.00011757	45.8444	297
Glycated haemoglobin levels	iRBD	rs73856768	C	T	-0.0263713	0.00375424	4	157788804	2.15e-12	0.09443	0.000118939	46.3784	297
Glycated haemoglobin levels	iRBD	rs11070339	G	A	0.0156436	0.00204657	15	41856543	2.11e-14	0.4254	0.000119637	46.6506	297
Glycated haemoglobin levels	iRBD	rs12147688	T	G	0.0178243	0.00231268	14	20939589	1.29e-14	0.2525	0.00011993	46.7647	297
Glycated haemoglobin levels	iRBD	rs838717	A	G	0.0156779	0.00203863	2	234296444	1.47e-14	0.4404	0.000121152	47.2413	297
Glycated haemoglobin levels	iRBD	rs11512059	T	C	0.0288335	0.00366523	11	16276894	3.64e-15	0.07952	0.000121707	47.4577	297
Glycated haemoglobin levels	iRBD	rs61138219	T	C	-0.020549	0.00279675	21	45733072	2.02e-13	0.1759	0.000122421	47.7363	297
Glycated haemoglobin levels	iRBD	rs55770587	T	C	-0.0453796	0.00502266	12	49586676	1.64e-19	0.03082	0.000123024	47.9712	297
Glycated haemoglobin levels	iRBD	rs41273438	G	A	0.0417802	0.00505024	9	124103523	1.31e-16	0.03678	0.000123682	48.2282	297
Glycated haemoglobin levels	iRBD	rs111559769	C	T	0.0205972	0.00262474	2	48149697	4.25e-15	0.1779	0.000124093	48.3882	297
Glycated haemoglobin levels	iRBD	rs4516170	C	T	-0.0488546	0.00458619	15	52586923	1.7e-26	0.02684	0.000124683	48.6184	297
Glycated haemoglobin levels	iRBD	rs3847378	G	A	-0.017924	0.00231321	10	26519952	9.3e-15	0.2654	0.000125271	48.8478	297
Glycated haemoglobin levels	iRBD	rs2512539	T	G	-0.0212447	0.002922	11	77914798	3.58e-13	0.167	0.000125572	48.965	297
Glycated haemoglobin levels	iRBD	rs8069197	T	C	-0.0183272	0.00234845	17	76306069	6e-15	0.2495	0.000125789	49.0498	297
Glycated haemoglobin levels	iRBD	rs6840504	T	C	0.0161888	0.00203289	4	18205102	1.67e-15	0.4264	0.000128199	49.9896	297
Glycated haemoglobin levels	iRBD	rs10758593	A	G	0.0161456	0.00205323	9	4292083	3.74e-15	0.4423	0.000128604	50.1476	297
Glycated haemoglobin levels	iRBD	rs216195	G	T	0.0179163	0.00219591	17	2203167	3.38e-16	0.2813	0.000129791	50.6103	297
Glycated haemoglobin levels	iRBD	rs13272050	T	C	-0.0207075	0.00268208	8	23406241	1.16e-14	0.1899	0.000131932	51.4452	297
Glycated haemoglobin levels	iRBD	rs35303761	G	A	0.0195021	0.00235406	7	69810892	1.19e-16	0.2247	0.000132515	51.6728	297
Glycated haemoglobin levels	iRBD	rs13233631	G	A	-0.0163218	0.00203082	7	80270822	9.2e-16	0.4642	0.000132518	51.6738	297
Glycated haemoglobin levels	iRBD	rs4368494	A	G	-0.0180066	0.00222529	3	64701387	5.88e-16	0.2972	0.000135448	52.8167	297
Glycated haemoglobin levels	iRBD	rs76505278	C	T	-0.0261022	0.00330049	4	146016257	2.6e-15	0.1123	0.000135841	52.9698	297
Glycated haemoglobin levels	iRBD	rs3827181	T	C	0.017669	0.00211284	21	35107734	6.13e-17	0.3211	0.000136113	53.076	297
Glycated haemoglobin levels	iRBD	rs2658747	G	A	0.0171027	0.00206976	18	74579119	1.42e-16	0.3698	0.000136334	53.1622	297
Glycated haemoglobin levels	iRBD	rs17430251	G	A	0.0241595	0.00307762	4	106115708	4.16e-15	0.1362	0.00013734	53.5543	297
Glycated haemoglobin levels	iRBD	rs1570360	G	A	0.0178508	0.0021435	6	43737830	8.23e-17	0.3221	0.000139156	54.2626	297
Glycated haemoglobin levels	iRBD	rs10752943	T	C	-0.0169566	0.00203587	1	172354992	8.16e-17	0.4175	0.000139849	54.533	297
Glycated haemoglobin levels	iRBD	rs2978457	C	T	0.0167773	0.0020178	8	42324760	9.2e-17	0.4871	0.000140645	54.8435	297
Glycated haemoglobin levels	iRBD	rs521048	G	A	-0.019037	0.00228648	12	118830958	8.37e-17	0.2644	0.000140971	54.9706	297
Glycated haemoglobin levels	iRBD	rs1891058	A	G	0.0174012	0.00207214	1	213937382	4.55e-17	0.3757	0.000142044	55.389	297
Glycated haemoglobin levels	iRBD	rs4234731	G	A	0.0176143	0.00206017	4	6299914	1.23e-17	0.3618	0.00014328	55.8711	297
Glycated haemoglobin levels	iRBD	rs6893283	T	C	-0.0606793	0.00838922	5	55296666	4.72e-13	0.01988	0.000143485	55.951	297
Glycated haemoglobin levels	iRBD	rs73564493	A	G	-0.0303205	0.003894	11	119056273	6.89e-15	0.08549	0.00014375	56.0541	297
Glycated haemoglobin levels	iRBD	rs1866476	C	T	-0.0193467	0.0022694	15	90428543	1.53e-17	0.2604	0.000144172	56.219	297
Glycated haemoglobin levels	iRBD	rs72805701	T	G	0.058079	0.00694966	10	71105136	6.43e-17	0.02187	0.000144316	56.2749	297
Glycated haemoglobin levels	iRBD	rs111333451	A	G	0.0292079	0.00344642	10	70176159	2.35e-17	0.09344	0.000144531	56.3588	297
Glycated haemoglobin levels	iRBD	rs190003288	G	A	0.0557813	0.0068715	10	71013941	4.75e-16	0.02386	0.000144941	56.5186	297
Glycated haemoglobin levels	iRBD	rs2665357	C	A	0.0170948	0.00201558	6	160848167	2.23e-17	0.4831	0.000145949	56.912	297
Glycated haemoglobin levels	iRBD	rs7546390	C	T	0.0284726	0.00348856	1	203649423	3.3e-16	0.1004	0.000146443	57.1044	297
Glycated haemoglobin levels	iRBD	rs1496653	G	A	-0.0206157	0.00249483	3	23454790	1.42e-16	0.2217	0.000146669	57.1928	297
Glycated haemoglobin levels	iRBD	rs6589939	G	A	0.0177546	0.00207849	11	122518525	1.32e-17	0.3728	0.000147412	57.4826	297
Glycated haemoglobin levels	iRBD	rs11616380	T	G	-0.0194667	0.00223186	13	80705315	2.73e-18	0.2684	0.000148823	58.0329	297
Glycated haemoglobin levels	iRBD	rs72811487	A	G	-0.0558587	0.00545477	16	88788060	1.31e-24	0.02485	0.00015122	58.9677	297
Glycated haemoglobin levels	iRBD	rs4660342	G	T	0.0190795	0.00219968	1	46595082	4.18e-18	0.2992	0.000152658	59.5285	297
Glycated haemoglobin levels	iRBD	rs4837345	T	C	-0.0197077	0.00217866	9	131923949	1.49e-19	0.2753	0.000154977	60.4328	297
Glycated haemoglobin levels	iRBD	rs6736362	T	C	0.0179463	0.00203836	2	219115108	1.32e-18	0.4125	0.000156103	60.8721	297
Glycated haemoglobin levels	iRBD	rs72698718	A	G	0.0248398	0.00295047	14	101178555	3.8e-17	0.1491	0.000156561	61.0505	297
Glycated haemoglobin levels	iRBD	rs2068888	A	G	-0.0177831	0.00204621	10	94839642	3.6e-18	0.4861	0.000157997	61.6108	297
Glycated haemoglobin levels	iRBD	rs17698176	G	T	0.0212981	0.00242197	17	44819595	1.45e-18	0.2276	0.000159487	62.192	297
Glycated haemoglobin levels	iRBD	rs3757970	G	A	0.01841	0.00207222	8	145546036	6.44e-19	0.3787	0.00015949	62.1931	297
Glycated haemoglobin levels	iRBD	rs1981767	A	G	0.0196234	0.00225706	3	186649103	3.49e-18	0.2932	0.000159602	62.2368	297
Glycated haemoglobin levels	iRBD	rs6518681	G	A	0.0364115	0.00348748	22	30609554	1.62e-25	0.0646	0.000160227	62.4806	297
Glycated haemoglobin levels	iRBD	rs8013143	G	A	0.0195241	0.00224414	14	23494277	3.32e-18	0.3012	0.000160465	62.5732	297
Glycated haemoglobin levels	iRBD	rs145496147	T	C	-0.0739714	0.00935389	6	26099201	2.61e-15	0.01491	0.000160735	62.6787	297
Glycated haemoglobin levels	iRBD	rs79755767	A	G	-0.0339109	0.00338802	12	54698408	1.39e-23	0.07654	0.000162561	63.3906	297
Glycated haemoglobin levels	iRBD	rs1535464	A	G	-0.0222134	0.00232935	14	100793431	1.48e-21	0.2107	0.000164122	63.9995	297
Glycated haemoglobin levels	iRBD	rs7124355	G	A	-0.0198456	0.00216185	11	17412960	4.32e-20	0.3101	0.000168518	65.7141	297
Glycated haemoglobin levels	iRBD	rs1579238	G	A	-0.0211887	0.00235637	12	97865504	2.43e-19	0.2545	0.000170363	66.4334	297
Glycated haemoglobin levels	iRBD	rs117709065	T	C	-0.0827408	0.00798824	12	48314782	3.86e-25	0.01292	0.000174616	68.0924	297
Glycated haemoglobin levels	iRBD	rs60833263	A	G	0.0187765	0.00202858	5	1100831	2.12e-20	0.4801	0.000175999	68.6319	297
Glycated haemoglobin levels	iRBD	rs7720275	C	T	0.0245425	0.00267386	5	158246650	4.36e-20	0.1789	0.00017696	69.0064	297
Glycated haemoglobin levels	iRBD	rs75367758	A	G	-0.0445917	0.00469631	3	141102560	2.2e-21	0.04672	0.000177117	69.068	297
Glycated haemoglobin levels	iRBD	rs4985996	T	C	-0.0204267	0.00211708	17	21155684	4.99e-22	0.3072	0.000177605	69.2582	297
Glycated haemoglobin levels	iRBD	rs12493136	A	G	0.0258107	0.00273086	3	152382453	3.34e-21	0.159	0.000178165	69.4766	297
Glycated haemoglobin levels	iRBD	rs3845724	G	A	0.0191101	0.00205436	2	169610232	1.38e-20	0.4354	0.00017955	70.0168	297
Glycated haemoglobin levels	iRBD	rs3748059	G	A	-0.0224555	0.00252143	6	6900951	5.3e-19	0.2346	0.000181089	70.617	297
Glycated haemoglobin levels	iRBD	rs12466687	C	A	-0.0214502	0.00317379	2	28096707	1.39e-11	0.2704	0.000181545	70.7949	297
Glycated haemoglobin levels	iRBD	rs4239217	A	G	-0.0195878	0.00207044	17	36098987	3.06e-21	0.3857	0.000181816	70.9005	297
Glycated haemoglobin levels	iRBD	rs9994509	G	A	-0.019936	0.00206655	4	110827942	5.06e-22	0.3748	0.000186262	72.6347	297
Glycated haemoglobin levels	iRBD	rs1159619	A	C	0.0193937	0.00202394	6	126801144	9.5e-22	0.4543	0.000186487	72.7223	297
Glycated haemoglobin levels	iRBD	rs2236497	C	T	-0.0248654	0.00248236	9	4844704	1.29e-23	0.1859	0.000187145	72.979	297
Glycated haemoglobin levels	iRBD	rs2248369	A	G	0.0200359	0.00212227	17	80633277	3.7e-21	0.3887	0.000190773	74.3941	297
Glycated haemoglobin levels	iRBD	rs2595701	G	A	-0.0209416	0.00217064	7	44148553	5.03e-22	0.3201	0.000190889	74.4393	297
Glycated haemoglobin levels	iRBD	rs267738	G	T	-0.0249404	0.00243106	1	150940625	1.08e-24	0.1909	0.000192152	74.932	297
Glycated haemoglobin levels	iRBD	rs35889227	T	G	-0.02008	0.0020871	14	90055468	6.52e-22	0.3926	0.000192301	74.9902	297
Glycated haemoglobin levels	iRBD	rs2954031	T	G	0.0200489	0.00203047	8	126491733	5.4e-23	0.4284	0.000196858	76.7674	297
Glycated haemoglobin levels	iRBD	rs6077396	A	G	-0.0198814	0.00201084	20	8604593	4.73e-23	0.4712	0.000196979	76.8148	297
Glycated haemoglobin levels	iRBD	rs6785881	T	C	-0.0201368	0.00201957	3	160153989	2.05e-23	0.4344	0.000199255	77.7026	297
Glycated haemoglobin levels	iRBD	rs28565268	C	T	0.0288508	0.00465825	8	42191238	5.89e-10	0.1402	0.000200674	78.2559	297
Glycated haemoglobin levels	iRBD	rs12035330	G	A	0.0227288	0.00230898	1	40001060	7.3e-23	0.2674	0.0002024	78.9293	297
Glycated haemoglobin levels	iRBD	rs2737263	T	G	-0.0238712	0.00223401	8	116667539	1.19e-26	0.2396	0.000207638	80.9723	297
Glycated haemoglobin levels	iRBD	rs72900998	C	T	-0.0346045	0.00353754	1	51205760	1.34e-22	0.09642	0.000208655	81.3689	297
Glycated haemoglobin levels	iRBD	rs10492373	A	G	-0.0253394	0.0025299	12	27959998	1.3e-23	0.2078	0.000211399	82.4392	297
Glycated haemoglobin levels	iRBD	rs11564725	T	C	0.0251106	0.00238873	11	2177369	7.6e-26	0.2207	0.000216896	84.5832	297
Glycated haemoglobin levels	iRBD	rs1975283	C	A	-0.023107	0.00218158	1	118142558	3.25e-26	0.2893	0.000219559	85.6221	297
Glycated haemoglobin levels	iRBD	rs17850433	C	T	0.0965122	0.0091719	21	45746102	6.8e-26	0.01193	0.000219595	85.6361	297
Glycated haemoglobin levels	iRBD	rs592423	C	A	-0.0210447	0.00202312	6	139840693	2.43e-25	0.4642	0.000220304	85.9128	297
Glycated haemoglobin levels	iRBD	rs348330	A	G	-0.0218986	0.00210177	1	229672955	2.03e-25	0.3579	0.000220408	85.9531	297
Glycated haemoglobin levels	iRBD	rs918739	T	G	-0.0220796	0.00214881	16	11439733	9.11e-25	0.3529	0.000222657	86.8302	297
Glycated haemoglobin levels	iRBD	rs1399627	G	A	0.0221275	0.00212428	2	227083411	2.09e-25	0.3618	0.00022611	88.1773	297
Glycated haemoglobin levels	iRBD	rs28421305	A	G	0.0232506	0.00226345	16	30838128	9.41e-25	0.3052	0.000229268	89.409	297
Glycated haemoglobin levels	iRBD	rs8078338	G	A	-0.021452	0.00202075	17	8129160	2.51e-26	0.4712	0.000229331	89.4336	297
Glycated haemoglobin levels	iRBD	rs247826	T	C	0.0261051	0.00242481	16	84582965	4.99e-27	0.2247	0.00023744	92.5967	297
Glycated haemoglobin levels	iRBD	rs998584	A	C	0.021901	0.00201857	6	43757896	2e-27	0.496	0.000239812	93.5218	297
Glycated haemoglobin levels	iRBD	rs8110787	T	C	-0.0230924	0.00205716	19	12999458	3.06e-29	0.3419	0.000239971	93.5841	297
Glycated haemoglobin levels	iRBD	rs17168486	T	C	0.0294785	0.00266656	7	14898282	2.08e-28	0.166	0.000240611	93.8335	297
Glycated haemoglobin levels	iRBD	rs1121980	A	G	0.0220953	0.00203551	16	53809247	1.89e-27	0.4433	0.000240962	93.9706	297
Glycated haemoglobin levels	iRBD	rs13019832	A	G	-0.0224677	0.00205152	2	60710571	6.52e-28	0.4245	0.000246644	96.1869	297
Glycated haemoglobin levels	iRBD	rs12607898	G	A	0.0253603	0.00231242	18	43802778	5.51e-28	0.2604	0.000247729	96.6102	297
Glycated haemoglobin levels	iRBD	rs11042852	G	A	0.0406999	0.00359694	11	10517661	1.1e-29	0.0825	0.000250771	97.7967	297
Glycated haemoglobin levels	iRBD	rs111631066	A	G	-0.0759778	0.00842372	2	127451514	1.89e-19	0.02286	0.000257891	100.574	297
Glycated haemoglobin levels	iRBD	rs3811444	T	C	0.0245381	0.00213707	1	248039451	1.62e-30	0.3449	0.00027209	106.113	297
Glycated haemoglobin levels	iRBD	rs174559	A	G	-0.0267452	0.0022392	11	61581656	6.97e-33	0.2674	0.000280253	109.298	297
Glycated haemoglobin levels	iRBD	rs2858010	C	T	-0.0255762	0.00213288	16	289694	3.94e-33	0.3111	0.000280387	109.35	297
Glycated haemoglobin levels	iRBD	rs12459419	T	C	-0.025671	0.00214243	19	51728477	4.41e-33	0.3101	0.00028197	109.968	297
Glycated haemoglobin levels	iRBD	rs4485355	T	C	0.0264196	0.00222548	16	68754730	1.67e-32	0.2873	0.000285841	111.478	297
Glycated haemoglobin levels	iRBD	rs6777684	G	A	0.0246072	0.00207404	3	187741842	1.81e-32	0.3946	0.000289304	112.828	297
Glycated haemoglobin levels	iRBD	rs9303620	C	T	-0.0279754	0.00225349	17	27152869	2.19e-35	0.2604	0.000301454	117.568	297
Glycated haemoglobin levels	iRBD	rs2060779	A	G	-0.0275391	0.00243645	17	57506092	1.27e-29	0.2744	0.000302003	117.783	297
Glycated haemoglobin levels	iRBD	rs78588343	A	G	-0.0341809	0.00262339	6	7249460	8.34e-39	0.1561	0.000307816	120.05	297
Glycated haemoglobin levels	iRBD	rs7732130	A	G	-0.0265154	0.00215898	5	76435004	1.14e-34	0.328	0.000309934	120.877	297
Glycated haemoglobin levels	iRBD	rs10407429	A	G	-0.0254364	0.00203485	19	46157237	7.43e-36	0.4483	0.000320046	124.822	297
Glycated haemoglobin levels	iRBD	rs8050500	C	T	-0.0261764	0.00202389	16	31404571	2.9e-38	0.4722	0.000341543	133.209	297
Glycated haemoglobin levels	iRBD	rs1967604	G	A	-0.0291713	0.00223336	9	110530324	5.46e-39	0.2803	0.000343334	133.907	297
Glycated haemoglobin levels	iRBD	rs368865	G	A	0.0302686	0.00225019	13	113479820	3.01e-41	0.2555	0.000348554	135.944	297
Glycated haemoglobin levels	iRBD	rs9273368	A	G	0.0302503	0.00219112	6	32626475	2.35e-43	0.2604	0.000352474	137.474	297
Glycated haemoglobin levels	iRBD	rs849142	C	T	-0.026567	0.00201284	7	28185891	8.91e-40	0.492	0.000352812	137.606	297
Glycated haemoglobin levels	iRBD	rs10228066	T	C	0.0266163	0.00202484	7	15063569	1.82e-39	0.492	0.000354123	138.117	297
Glycated haemoglobin levels	iRBD	rs2237895	C	A	0.0270837	0.00203862	11	2857194	2.82e-40	0.4195	0.000357257	139.339	297
Glycated haemoglobin levels	iRBD	rs61850681	A	G	-0.0342267	0.00240244	10	50248924	4.7e-46	0.1978	0.000371765	145	297
Glycated haemoglobin levels	iRBD	rs1641523	T	C	-0.0276028	0.00204928	17	7549681	2.36e-41	0.4245	0.000372271	145.198	297
Glycated haemoglobin levels	iRBD	rs2143918	C	A	-0.0274502	0.00201612	22	43114020	3.24e-42	0.4901	0.000376609	146.89	297
Glycated haemoglobin levels	iRBD	rs111492193	T	C	-0.0353073	0.00272895	9	140100981	2.74e-38	0.1859	0.000377326	147.17	297
Glycated haemoglobin levels	iRBD	rs4499344	A	G	-0.0294844	0.00221462	19	33073431	1.93e-40	0.3191	0.000377768	147.342	297
Glycated haemoglobin levels	iRBD	rs111754661	C	T	-0.0470041	0.00371698	7	123426927	1.18e-36	0.09443	0.000377862	147.379	297
Glycated haemoglobin levels	iRBD	rs7923837	A	G	-0.0287696	0.00209817	10	94481917	8.63e-43	0.3748	0.000387897	151.295	297
Glycated haemoglobin levels	iRBD	rs1005752	A	C	0.0305262	0.00224114	15	77818128	3.01e-42	0.2962	0.000388517	151.537	297
Glycated haemoglobin levels	iRBD	rs61944004	A	G	0.0338333	0.00244049	13	28492405	1.06e-43	0.2256	0.000399966	156.004	297
Glycated haemoglobin levels	iRBD	rs16856859	G	A	0.0290575	0.00204818	3	171784736	1.1e-45	0.4135	0.000409534	159.737	297
Glycated haemoglobin levels	iRBD	rs7025532	C	T	0.0361835	0.0025152	9	79954545	6.34e-47	0.1958	0.000412314	160.822	297
Glycated haemoglobin levels	iRBD	rs11065979	T	C	-0.0290371	0.00203541	12	112059557	3.56e-46	0.4394	0.000415384	162.02	297
Glycated haemoglobin levels	iRBD	rs79121130	T	C	0.0379279	0.00275458	2	175294257	3.91e-43	0.1809	0.000426308	166.283	297
Glycated haemoglobin levels	iRBD	rs28641468	C	T	0.0353614	0.00233929	9	139239585	1.26e-51	0.2445	0.000461958	180.195	297
Glycated haemoglobin levels	iRBD	rs1108646	G	A	-0.03281	0.00218791	17	17751478	7.79e-51	0.3708	0.000502309	195.942	297
Glycated haemoglobin levels	iRBD	rs7400121	G	A	0.0415988	0.00275508	13	114556577	1.65e-51	0.1769	0.000503932	196.576	297
Glycated haemoglobin levels	iRBD	rs11257655	T	C	0.0385711	0.00250505	10	12307894	1.7e-53	0.2266	0.000521457	203.415	297
Glycated haemoglobin levels	iRBD	rs9376091	T	C	-0.0394715	0.00230307	6	135419636	7.64e-66	0.2644	0.000606039	236.43	297
Glycated haemoglobin levels	iRBD	rs57696714	C	T	-0.0624256	0.00327002	2	43626521	3.04e-81	0.08549	0.000609339	237.718	297
Glycated haemoglobin levels	iRBD	rs1175550	G	A	-0.0423113	0.00242898	1	3691528	5.88e-68	0.2187	0.0006118	238.679	297
Glycated haemoglobin levels	iRBD	rs115340137	C	T	-0.145343	0.0107226	1	25818182	7.42e-42	0.01491	0.000620543	242.092	297
Glycated haemoglobin levels	iRBD	rs67131976	T	C	0.0475328	0.00266147	6	20686878	2.43e-71	0.1779	0.000660872	257.836	297
Glycated haemoglobin levels	iRBD	rs1604038	T	C	-0.0412293	0.00223025	3	170709193	2.66e-76	0.2893	0.000698999	272.721	297
Glycated haemoglobin levels	iRBD	rs1822534	G	A	-0.0407818	0.00206684	3	12266804	1.16e-86	0.4095	0.000804334	313.852	297
Glycated haemoglobin levels	iRBD	rs11708067	G	A	-0.0533082	0.0023397	3	123065778	6.58e-115	0.171	0.000805691	314.382	297
Glycated haemoglobin levels	iRBD	rs10811660	A	G	-0.0543909	0.00265476	9	22134068	2.75e-93	0.168	0.000827018	322.711	297
Glycated haemoglobin levels	iRBD	rs550057	T	C	0.046613	0.00231097	9	136146597	1.79e-90	0.2823	0.000880436	343.573	297
Glycated haemoglobin levels	iRBD	rs12876143	C	T	0.0775161	0.0035306	13	113366291	7.67e-107	0.08549	0.000939545	366.661	297
Glycated haemoglobin levels	iRBD	rs61750929	T	C	-0.103746	0.00441575	9	91495135	4.66e-122	0.04672	0.000958729	374.155	297
Glycated haemoglobin levels	iRBD	rs35365035	C	T	0.0466059	0.00205957	19	17252151	2.25e-113	0.4095	0.00105047	409.997	297
Glycated haemoglobin levels	iRBD	rs13266634	T	C	-0.0544335	0.00217605	8	118184783	4.22e-138	0.2833	0.00120322	469.687	297
Glycated haemoglobin levels	iRBD	rs1800562	A	G	-0.125432	0.00375236	6	26093141	1e-200	0.04274	0.00128739	502.585	297
Glycated haemoglobin levels	iRBD	rs7679687	T	G	0.0556649	0.00217482	4	144945184	1.73e-144	0.341	0.00139262	543.722	297
Glycated haemoglobin levels	iRBD	rs150025254	T	C	-0.155735	0.00606205	10	71036891	1.5e-145	0.0328	0.00153884	600.897	297
Glycated haemoglobin levels	iRBD	rs76895963	G	T	-0.186332	0.00780161	12	4384844	4.51e-126	0.02386	0.00161729	631.581	297
Glycated haemoglobin levels	iRBD	rs4760682	A	C	0.0771331	0.00257838	12	48512285	1.24e-196	0.1829	0.00177828	694.564	297
Glycated haemoglobin levels	iRBD	rs855791	G	A	-0.0633431	0.00203266	22	37462936	1e-200	0.3877	0.00190497	744.142	297
Glycated haemoglobin levels	iRBD	rs117447349	A	G	-0.21925	0.00879056	10	71071841	2.64e-137	0.02187	0.00205662	803.503	297
Glycated haemoglobin levels	iRBD	rs2263122	G	T	-0.0651341	0.00202562	17	80697773	1e-200	0.4911	0.00212055	828.533	297
Glycated haemoglobin levels	iRBD	rs4737010	A	G	0.0793026	0.00240563	8	41630447	1e-200	0.2416	0.00230462	900.619	297
Glycated haemoglobin levels	iRBD	rs7903146	T	C	0.074017	0.00224213	10	114758349	1e-200	0.3171	0.00237272	927.292	297
Glycated haemoglobin levels	iRBD	rs857725	G	T	0.0778152	0.00227723	1	158607935	1e-200	0.2763	0.00242158	946.433	297
Glycated haemoglobin levels	iRBD	rs853773	G	A	0.0702894	0.00206036	2	169814347	1e-200	0.5	0.0024703	965.523	297
Glycated haemoglobin levels	iRBD	rs191358944	T	C	-0.33801	0.00880814	10	71114311	1e-200	0.01193	0.0026935	1053	297
Glycated haemoglobin levels	iRBD	rs878521	A	G	0.085419	0.00232445	7	44255643	1e-200	0.2535	0.00276151	1079.66	297
Glycated haemoglobin levels	iRBD	rs112691954	C	T	0.04286	0.00595607	14	64016146	6.2e-13	NA	NA	NA	NA
Glycated haemoglobin levels	iRBD	rs4142680	T	C	-0.0117257	0.00211647	12	54405190	3.02e-08	NA	NA	NA	NA
Glycated haemoglobin levels	iRBD	rs4683436	A	G	0.0117904	0.00210684	3	142641237	2.19e-08	NA	NA	NA	NA

## Sheet: S9
Supplementary Table S9: Leave_one_out analysis reults with three kinds of metabolic traits as the exposure factor and iRBD as the outcome.
exposure	outcome	SNP	beta	se	pval
Blood glucose levels	iRBD	rs10108430	0.421346	0.203288	0.0382046
Blood glucose levels	iRBD	rs10225744	0.441741	0.204255	0.0305649
Blood glucose levels	iRBD	rs10305423	0.437131	0.204421	0.0324852
Blood glucose levels	iRBD	rs10771370	0.43398	0.204497	0.0338227
Blood glucose levels	iRBD	rs10965247	0.427599	0.204896	0.0368959
Blood glucose levels	iRBD	rs11032966	0.430569	0.204199	0.0349813
Blood glucose levels	iRBD	rs11257655	0.434521	0.20506	0.0340909
Blood glucose levels	iRBD	rs113861493	0.440533	0.204636	0.031337
Blood glucose levels	iRBD	rs114757976	0.464763	0.202504	0.0217285
Blood glucose levels	iRBD	rs11580608	0.426556	0.204674	0.037153
Blood glucose levels	iRBD	rs11610045	0.444928	0.204051	0.0292219
Blood glucose levels	iRBD	rs116401167	0.420274	0.203854	0.0392419
Blood glucose levels	iRBD	rs11651755	0.455137	0.202438	0.0245583
Blood glucose levels	iRBD	rs11708067	0.414488	0.206732	0.0449675
Blood glucose levels	iRBD	rs117420076	0.443107	0.202907	0.0289774
Blood glucose levels	iRBD	rs1175716	0.463946	0.202421	0.0219064
Blood glucose levels	iRBD	rs117892540	0.422662	0.202885	0.0372275
Blood glucose levels	iRBD	rs11839569	0.443014	0.205306	0.030942
Blood glucose levels	iRBD	rs12146652	0.394264	0.202612	0.0516662
Blood glucose levels	iRBD	rs12315434	0.425212	0.203519	0.0366812
Blood glucose levels	iRBD	rs1260326	0.454006	0.206753	0.0280998
Blood glucose levels	iRBD	rs1359790	0.419145	0.202839	0.0387918
Blood glucose levels	iRBD	rs139010077	0.430293	0.203879	0.034813
Blood glucose levels	iRBD	rs139643	0.430957	0.204147	0.0347714
Blood glucose levels	iRBD	rs140655027	0.42685	0.203225	0.0356953
Blood glucose levels	iRBD	rs149290349	0.416677	0.203794	0.0408947
Blood glucose levels	iRBD	rs1513272	0.419902	0.202873	0.038473
Blood glucose levels	iRBD	rs1535464	0.445106	0.203798	0.0289584
Blood glucose levels	iRBD	rs17168486	0.428045	0.205131	0.0369162
Blood glucose levels	iRBD	rs17350833	0.442649	0.204137	0.0301288
Blood glucose levels	iRBD	rs174577	0.418945	0.203562	0.0395836
Blood glucose levels	iRBD	rs1820176	0.451889	0.205001	0.0275011
Blood glucose levels	iRBD	rs1836996	0.417548	0.203108	0.0398025
Blood glucose levels	iRBD	rs2168101	0.428809	0.204603	0.0360989
Blood glucose levels	iRBD	rs231848	0.438419	0.204446	0.0319989
Blood glucose levels	iRBD	rs2519093	0.435234	0.205327	0.0340305
Blood glucose levels	iRBD	rs2800732	0.439419	0.204619	0.0317533
Blood glucose levels	iRBD	rs28483077	0.44156	0.20417	0.030564
Blood glucose levels	iRBD	rs2848649	0.442634	0.204204	0.0301884
Blood glucose levels	iRBD	rs348330	0.452213	0.203277	0.0261069
Blood glucose levels	iRBD	rs35889227	0.438266	0.20554	0.0329847
Blood glucose levels	iRBD	rs35895680	0.431849	0.204202	0.0344457
Blood glucose levels	iRBD	rs3842727	0.410217	0.202685	0.0429792
Blood glucose levels	iRBD	rs4132537	0.448308	0.203368	0.027495
Blood glucose levels	iRBD	rs4233315	0.451298	0.20351	0.0265844
Blood glucose levels	iRBD	rs465983	0.423907	0.203339	0.037094
Blood glucose levels	iRBD	rs495714	0.448505	0.220585	0.042027
Blood glucose levels	iRBD	rs4977200	0.440355	0.204321	0.0311451
Blood glucose levels	iRBD	rs564449	0.440098	0.20451	0.0314004
Blood glucose levels	iRBD	rs57009615	0.422879	0.202697	0.0369551
Blood glucose levels	iRBD	rs6006399	0.45749	0.202451	0.0238364
Blood glucose levels	iRBD	rs60330317	0.428698	0.204122	0.0357112
Blood glucose levels	iRBD	rs61211588	0.44321	0.204101	0.0298917
Blood glucose levels	iRBD	rs61289363	0.445446	0.203765	0.0288098
Blood glucose levels	iRBD	rs62401198	0.465144	0.202341	0.0215153
Blood glucose levels	iRBD	rs6775569	0.431594	0.204352	0.0346854
Blood glucose levels	iRBD	rs6808574	0.420896	0.203815	0.0389144
Blood glucose levels	iRBD	rs6840504	0.44673	0.203466	0.0281203
Blood glucose levels	iRBD	rs6976501	0.439914	0.204746	0.0316675
Blood glucose levels	iRBD	rs7018475	0.441267	0.204537	0.0309748
Blood glucose levels	iRBD	rs7031649	0.431768	0.204218	0.0344939
Blood glucose levels	iRBD	rs7075575	0.422367	0.203302	0.0377523
Blood glucose levels	iRBD	rs7129793	0.447778	0.204035	0.0281914
Blood glucose levels	iRBD	rs714549	0.424455	0.203233	0.0367518
Blood glucose levels	iRBD	rs7177055	0.463967	0.20277	0.0221287
Blood glucose levels	iRBD	rs718336	0.460173	0.202664	0.0231702
Blood glucose levels	iRBD	rs721156	0.41759	0.203215	0.0398869
Blood glucose levels	iRBD	rs7256920	0.451396	0.203751	0.0267303
Blood glucose levels	iRBD	rs72764668	0.449658	0.202571	0.0264356
Blood glucose levels	iRBD	rs730497	0.444907	0.218776	0.0419901
Blood glucose levels	iRBD	rs7501994	0.405672	0.202478	0.04512
Blood glucose levels	iRBD	rs76323047	0.438058	0.206521	0.0339112
Blood glucose levels	iRBD	rs7650482	0.446739	0.203397	0.0280642
Blood glucose levels	iRBD	rs76895963	0.431889	0.204997	0.035134
Blood glucose levels	iRBD	rs7732130	0.457503	0.203453	0.0245319
Blood glucose levels	iRBD	rs7766070	0.426642	0.204869	0.0372953
Blood glucose levels	iRBD	rs78444298	0.425189	0.203293	0.0364825
Blood glucose levels	iRBD	rs78588343	0.458455	0.203664	0.0243829
Blood glucose levels	iRBD	rs7895494	0.422225	0.202567	0.0371265
Blood glucose levels	iRBD	rs78959242	0.411963	0.202554	0.0419669
Blood glucose levels	iRBD	rs7903146	0.478296	0.20781	0.021358
Blood glucose levels	iRBD	rs79467716	0.43006	0.203898	0.0349278
Blood glucose levels	iRBD	rs80097396	0.432345	0.204413	0.0344251
Blood glucose levels	iRBD	rs8190647	0.42579	0.203607	0.036507
Blood glucose levels	iRBD	rs830577	0.448483	0.203975	0.0278978
Blood glucose levels	iRBD	rs853770	0.422796	0.211411	0.0455134
Blood glucose levels	iRBD	rs888955	0.45223	0.20275	0.0257158
Blood glucose levels	iRBD	rs9273363	0.438611	0.204187	0.0317067
Blood glucose levels	iRBD	rs9472135	0.446716	0.204276	0.0287555
Blood glucose levels	iRBD	rs9650069	0.409394	0.207048	0.0480094
Blood glucose levels	iRBD	rs9873519	0.437057	0.204467	0.0325543
Blood glucose levels	iRBD	rs9873618	0.458581	0.210641	0.0294748
Blood glucose levels	iRBD	rs993380	0.445725	0.203699	0.0286583
Blood glucose levels	iRBD	rs9987289	0.425825	0.205055	0.0378346
Blood glucose levels	iRBD	All	0.436475	0.20302	0.031562
Glycated haemoglobin levels	iRBD	rs1005752	0.125374	0.139413	0.368491
Glycated haemoglobin levels	iRBD	rs10228066	0.112769	0.139841	0.420006
Glycated haemoglobin levels	iRBD	rs10401969	0.107217	0.139412	0.441854
Glycated haemoglobin levels	iRBD	rs10407429	0.115948	0.139746	0.406705
Glycated haemoglobin levels	iRBD	rs10492373	0.108847	0.139696	0.435878
Glycated haemoglobin levels	iRBD	rs10752943	0.107117	0.13958	0.442831
Glycated haemoglobin levels	iRBD	rs10758593	0.109248	0.139632	0.43398
Glycated haemoglobin levels	iRBD	rs10811660	0.104749	0.140135	0.454768
Glycated haemoglobin levels	iRBD	rs10841891	0.108275	0.139528	0.437743
Glycated haemoglobin levels	iRBD	rs10886280	0.10153	0.138534	0.463627
Glycated haemoglobin levels	iRBD	rs10888260	0.105971	0.139324	0.446894
Glycated haemoglobin levels	iRBD	rs10890181	0.112021	0.139566	0.422185
Glycated haemoglobin levels	iRBD	rs10910045	0.116285	0.139165	0.403384
Glycated haemoglobin levels	iRBD	rs10916610	0.107777	0.139468	0.439655
Glycated haemoglobin levels	iRBD	rs11042852	0.0957779	0.138969	0.490696
Glycated haemoglobin levels	iRBD	rs11065979	0.118909	0.139774	0.394922
Glycated haemoglobin levels	iRBD	rs11070339	0.112534	0.139619	0.420238
Glycated haemoglobin levels	iRBD	rs1108646	0.106302	0.139938	0.44747
Glycated haemoglobin levels	iRBD	rs11120149	0.115052	0.139467	0.409408
Glycated haemoglobin levels	iRBD	rs111333451	0.113012	0.139585	0.418152
Glycated haemoglobin levels	iRBD	rs11149059	0.112921	0.139532	0.41835
Glycated haemoglobin levels	iRBD	rs111492193	0.10866	0.139794	0.436991
Glycated haemoglobin levels	iRBD	rs111559769	0.10774	0.139579	0.440175
Glycated haemoglobin levels	iRBD	rs111631066	0.105452	0.139475	0.449611
Glycated haemoglobin levels	iRBD	rs11166447	0.104941	0.139187	0.450873
Glycated haemoglobin levels	iRBD	rs111754661	0.104319	0.139682	0.455164
Glycated haemoglobin levels	iRBD	rs1121980	0.106579	0.139684	0.445463
Glycated haemoglobin levels	iRBD	rs112270735	0.107272	0.139498	0.441904
Glycated haemoglobin levels	iRBD	rs11257655	0.108331	0.14	0.439055
Glycated haemoglobin levels	iRBD	rs11258437	0.101967	0.138519	0.461658
Glycated haemoglobin levels	iRBD	rs112691954	0.117309	0.139175	0.399294
Glycated haemoglobin levels	iRBD	rs112750178	0.111616	0.139615	0.424028
Glycated haemoglobin levels	iRBD	rs112784971	0.108432	0.139566	0.437204
Glycated haemoglobin levels	iRBD	rs113582976	0.105916	0.139138	0.44652
Glycated haemoglobin levels	iRBD	rs113902512	0.110058	0.139557	0.430334
Glycated haemoglobin levels	iRBD	rs11512059	0.107597	0.139569	0.440751
Glycated haemoglobin levels	iRBD	rs115340137	0.105725	0.139379	0.448129
Glycated haemoglobin levels	iRBD	rs1154514	0.113025	0.139578	0.418077
Glycated haemoglobin levels	iRBD	rs11564725	0.0996921	0.13921	0.473914
Glycated haemoglobin levels	iRBD	rs115730158	0.10556	0.139211	0.448288
Glycated haemoglobin levels	iRBD	rs1159619	0.131647	0.137428	0.338096
Glycated haemoglobin levels	iRBD	rs11616380	0.103163	0.139331	0.459045
Glycated haemoglobin levels	iRBD	rs1166698	0.118056	0.13921	0.396415
Glycated haemoglobin levels	iRBD	rs11708067	0.0988942	0.140181	0.480514
Glycated haemoglobin levels	iRBD	rs117276569	0.109625	0.139543	0.432104
Glycated haemoglobin levels	iRBD	rs117447349	0.106708	0.140496	0.447547
Glycated haemoglobin levels	iRBD	rs1175550	0.0874201	0.139091	0.529669
Glycated haemoglobin levels	iRBD	rs11762803	0.112495	0.139569	0.420235
Glycated haemoglobin levels	iRBD	rs117709065	0.110826	0.139693	0.427574
Glycated haemoglobin levels	iRBD	rs117783723	0.109344	0.139545	0.43329
Glycated haemoglobin levels	iRBD	rs11786992	0.110594	0.139636	0.428353
Glycated haemoglobin levels	iRBD	rs11917973	0.113921	0.139498	0.414129
Glycated haemoglobin levels	iRBD	rs12035330	0.11072	0.139717	0.428093
Glycated haemoglobin levels	iRBD	rs12040433	0.108422	0.139522	0.437103
Glycated haemoglobin levels	iRBD	rs12147688	0.120672	0.138725	0.384373
Glycated haemoglobin levels	iRBD	rs12459419	0.123249	0.139284	0.376227
Glycated haemoglobin levels	iRBD	rs12466687	0.11372	0.139529	0.415058
Glycated haemoglobin levels	iRBD	rs12493136	0.113794	0.139662	0.415196
Glycated haemoglobin levels	iRBD	rs1259180	0.113066	0.139526	0.417732
Glycated haemoglobin levels	iRBD	rs12607898	0.0972466	0.138996	0.484154
Glycated haemoglobin levels	iRBD	rs12645001	0.114702	0.139441	0.410744
Glycated haemoglobin levels	iRBD	rs12650788	0.10814	0.139507	0.438247
Glycated haemoglobin levels	iRBD	rs12876143	0.106432	0.140336	0.448205
Glycated haemoglobin levels	iRBD	rs13019832	0.124156	0.139077	0.37201
Glycated haemoglobin levels	iRBD	rs13059110	0.110631	0.139611	0.428115
Glycated haemoglobin levels	iRBD	rs13170854	0.111735	0.139587	0.42344
Glycated haemoglobin levels	iRBD	rs13192435	0.112548	0.139641	0.420253
Glycated haemoglobin levels	iRBD	rs13233631	0.108201	0.139607	0.438317
Glycated haemoglobin levels	iRBD	rs13248311	0.110207	0.139585	0.429799
Glycated haemoglobin levels	iRBD	rs13266634	0.0985767	0.140595	0.483215
Glycated haemoglobin levels	iRBD	rs13272050	0.110532	0.139646	0.428646
Glycated haemoglobin levels	iRBD	rs13383320	0.108607	0.13954	0.436378
Glycated haemoglobin levels	iRBD	rs138599549	0.112402	0.139554	0.420569
Glycated haemoglobin levels	iRBD	rs1399627	0.113631	0.139703	0.416003
Glycated haemoglobin levels	iRBD	rs141192775	0.116123	0.139165	0.40404
Glycated haemoglobin levels	iRBD	rs142235947	0.108217	0.139451	0.437734
Glycated haemoglobin levels	iRBD	rs1427297	0.116084	0.139275	0.404569
Glycated haemoglobin levels	iRBD	rs144155527	0.10856	0.139529	0.436538
Glycated haemoglobin levels	iRBD	rs144993543	0.111414	0.139594	0.424796
Glycated haemoglobin levels	iRBD	rs145173553	0.105469	0.139095	0.448302
Glycated haemoglobin levels	iRBD	rs145496147	0.111943	0.139671	0.422856
Glycated haemoglobin levels	iRBD	rs147208676	0.108442	0.139563	0.437154
Glycated haemoglobin levels	iRBD	rs147558893	0.118192	0.13832	0.392836
Glycated haemoglobin levels	iRBD	rs147730268	0.114536	0.139469	0.411516
Glycated haemoglobin levels	iRBD	rs148407308	0.111599	0.13958	0.423979
Glycated haemoglobin levels	iRBD	rs1496653	0.108773	0.139631	0.435977
Glycated haemoglobin levels	iRBD	rs150025254	0.127982	0.140679	0.362958
Glycated haemoglobin levels	iRBD	rs1531583	0.111692	0.139599	0.423655
Glycated haemoglobin levels	iRBD	rs1535464	0.114743	0.139602	0.411118
Glycated haemoglobin levels	iRBD	rs1562397	0.112812	0.139552	0.418869
Glycated haemoglobin levels	iRBD	rs1570360	0.113791	0.139594	0.414982
Glycated haemoglobin levels	iRBD	rs1579238	0.105422	0.139537	0.449943
Glycated haemoglobin levels	iRBD	rs1604038	0.115857	0.140168	0.40849
Glycated haemoglobin levels	iRBD	rs1641523	0.109866	0.139855	0.432119
Glycated haemoglobin levels	iRBD	rs16856859	0.106276	0.139836	0.447254
Glycated haemoglobin levels	iRBD	rs16873415	0.105692	0.139232	0.447787
Glycated haemoglobin levels	iRBD	rs1705263	0.101774	0.138827	0.463496
Glycated haemoglobin levels	iRBD	rs1707731	0.117152	0.139068	0.39956
Glycated haemoglobin levels	iRBD	rs17168486	0.106717	0.139702	0.444933
Glycated haemoglobin levels	iRBD	rs17419291	0.107863	0.139481	0.439334
Glycated haemoglobin levels	iRBD	rs17430251	0.10944	0.139643	0.433207
Glycated haemoglobin levels	iRBD	rs174559	0.103191	0.139579	0.459723
Glycated haemoglobin levels	iRBD	rs17561351	0.113868	0.139577	0.41461
Glycated haemoglobin levels	iRBD	rs17698176	0.1129	0.139588	0.418624
Glycated haemoglobin levels	iRBD	rs1774217	0.102956	0.1388	0.458233
Glycated haemoglobin levels	iRBD	rs17850433	0.101863	0.13921	0.464338
Glycated haemoglobin levels	iRBD	rs1800562	0.0848056	0.140351	0.545685
Glycated haemoglobin levels	iRBD	rs1822534	0.102004	0.140208	0.466907
Glycated haemoglobin levels	iRBD	rs1866476	0.121438	0.138858	0.381823
Glycated haemoglobin levels	iRBD	rs1891058	0.103073	0.139281	0.45928
Glycated haemoglobin levels	iRBD	rs190003288	0.10712	0.139567	0.442775
Glycated haemoglobin levels	iRBD	rs191358944	0.104956	0.141553	0.458416
Glycated haemoglobin levels	iRBD	rs1965794	0.103945	0.139019	0.45464
Glycated haemoglobin levels	iRBD	rs1967604	0.103591	0.139713	0.458417
Glycated haemoglobin levels	iRBD	rs1975283	0.104247	0.139569	0.455109
Glycated haemoglobin levels	iRBD	rs1981767	0.10161	0.139198	0.465411
Glycated haemoglobin levels	iRBD	rs2060779	0.105656	0.139702	0.449474
Glycated haemoglobin levels	iRBD	rs2060985	0.113284	0.139579	0.417014
Glycated haemoglobin levels	iRBD	rs2068888	0.108141	0.139641	0.438681
Glycated haemoglobin levels	iRBD	rs2073040	0.115712	0.139375	0.406416
Glycated haemoglobin levels	iRBD	rs2143918	0.110315	0.139877	0.430315
Glycated haemoglobin levels	iRBD	rs216195	0.102938	0.13926	0.459799
Glycated haemoglobin levels	iRBD	rs2236497	0.106588	0.139627	0.445241
Glycated haemoglobin levels	iRBD	rs2237895	0.105436	0.139775	0.450652
Glycated haemoglobin levels	iRBD	rs2248369	0.112387	0.139656	0.42097
Glycated haemoglobin levels	iRBD	rs2263122	0.109879	0.14144	0.437242
Glycated haemoglobin levels	iRBD	rs2267716	0.114327	0.139463	0.412349
Glycated haemoglobin levels	iRBD	rs2292662	0.111247	0.139597	0.425503
Glycated haemoglobin levels	iRBD	rs247826	0.119873	0.139404	0.389844
Glycated haemoglobin levels	iRBD	rs2512539	0.106633	0.13949	0.4446
Glycated haemoglobin levels	iRBD	rs2546197	0.111419	0.13959	0.424761
Glycated haemoglobin levels	iRBD	rs255154	0.109946	0.139594	0.430925
Glycated haemoglobin levels	iRBD	rs2595701	0.108963	0.139686	0.435357
Glycated haemoglobin levels	iRBD	rs2658747	0.11236	0.139639	0.421021
Glycated haemoglobin levels	iRBD	rs2665357	0.124319	0.138524	0.369474
Glycated haemoglobin levels	iRBD	rs267738	0.107789	0.139677	0.440291
Glycated haemoglobin levels	iRBD	rs2726032	0.110098	0.139604	0.43032
Glycated haemoglobin levels	iRBD	rs2737263	0.117425	0.139542	0.400065
Glycated haemoglobin levels	iRBD	rs2771425	0.107243	0.139438	0.441827
Glycated haemoglobin levels	iRBD	rs2793003	0.113709	0.139542	0.415144
Glycated haemoglobin levels	iRBD	rs2796441	0.107127	0.139465	0.442413
Glycated haemoglobin levels	iRBD	rs28421305	0.110543	0.139741	0.42891
Glycated haemoglobin levels	iRBD	rs28565268	0.112875	0.139527	0.418523
Glycated haemoglobin levels	iRBD	rs2858010	0.103026	0.139617	0.460566
Glycated haemoglobin levels	iRBD	rs28641468	0.12127	0.139597	0.385002
Glycated haemoglobin levels	iRBD	rs2920880	0.1068	0.139382	0.443535
Glycated haemoglobin levels	iRBD	rs2927328	0.112693	0.139561	0.419388
Glycated haemoglobin levels	iRBD	rs2954031	0.0952035	0.138614	0.492192
Glycated haemoglobin levels	iRBD	rs2959356	0.102063	0.138723	0.461895
Glycated haemoglobin levels	iRBD	rs2978457	0.116687	0.139436	0.402677
Glycated haemoglobin levels	iRBD	rs34079969	0.106196	0.139313	0.445889
Glycated haemoglobin levels	iRBD	rs34831382	0.114171	0.139432	0.412885
Glycated haemoglobin levels	iRBD	rs348330	0.117306	0.139544	0.400552
Glycated haemoglobin levels	iRBD	rs35303761	0.111298	0.139665	0.425514
Glycated haemoglobin levels	iRBD	rs35365035	0.124642	0.140242	0.374128
Glycated haemoglobin levels	iRBD	rs35678857	0.119586	0.138696	0.388567
Glycated haemoglobin levels	iRBD	rs35889227	0.1099	0.139696	0.431453
Glycated haemoglobin levels	iRBD	rs35895680	0.108671	0.139555	0.436159
Glycated haemoglobin levels	iRBD	rs35958372	0.104252	0.139028	0.453336
Glycated haemoglobin levels	iRBD	rs368865	0.103082	0.139704	0.460601
Glycated haemoglobin levels	iRBD	rs3731197	0.118645	0.138897	0.393
Glycated haemoglobin levels	iRBD	rs3741414	0.107699	0.139554	0.44027
Glycated haemoglobin levels	iRBD	rs3748059	0.108263	0.139626	0.438115
Glycated haemoglobin levels	iRBD	rs3757970	0.1125	0.139637	0.420439
Glycated haemoglobin levels	iRBD	rs3811444	0.126177	0.138926	0.363755
Glycated haemoglobin levels	iRBD	rs3827181	0.115657	0.139494	0.407038
Glycated haemoglobin levels	iRBD	rs3845724	0.10714	0.139629	0.442893
Glycated haemoglobin levels	iRBD	rs3847378	0.106596	0.139526	0.444875
Glycated haemoglobin levels	iRBD	rs41273438	0.112808	0.139643	0.419189
Glycated haemoglobin levels	iRBD	rs41295942	0.113405	0.139437	0.416042
Glycated haemoglobin levels	iRBD	rs4142680	0.106181	0.139262	0.44579
Glycated haemoglobin levels	iRBD	rs4234731	0.107086	0.139581	0.442964
Glycated haemoglobin levels	iRBD	rs4238013	0.107731	0.139564	0.440168
Glycated haemoglobin levels	iRBD	rs4239217	0.112874	0.139673	0.419017
Glycated haemoglobin levels	iRBD	rs4261754	0.109621	0.139592	0.432282
Glycated haemoglobin levels	iRBD	rs4368494	0.115563	0.139509	0.407471
Glycated haemoglobin levels	iRBD	rs4382717	0.107094	0.139393	0.442319
Glycated haemoglobin levels	iRBD	rs4485355	0.1227	0.139338	0.378539
Glycated haemoglobin levels	iRBD	rs4499344	0.0877582	0.138571	0.526531
Glycated haemoglobin levels	iRBD	rs4509	0.113552	0.139508	0.415677
Glycated haemoglobin levels	iRBD	rs4516170	0.10861	0.13964	0.436696
Glycated haemoglobin levels	iRBD	rs45607834	0.104456	0.139185	0.452964
Glycated haemoglobin levels	iRBD	rs4660342	0.11487	0.13955	0.410427
Glycated haemoglobin levels	iRBD	rs4683436	0.108506	0.139518	0.436735
Glycated haemoglobin levels	iRBD	rs4687680	0.108744	0.139571	0.435901
Glycated haemoglobin levels	iRBD	rs4737010	0.132458	0.141231	0.348305
Glycated haemoglobin levels	iRBD	rs4760682	0.155046	0.139993	0.268065
Glycated haemoglobin levels	iRBD	rs4808072	0.106914	0.139474	0.443348
Glycated haemoglobin levels	iRBD	rs4837345	0.108671	0.139663	0.436513
Glycated haemoglobin levels	iRBD	rs4945829	0.111473	0.139597	0.424561
Glycated haemoglobin levels	iRBD	rs4947490	0.110606	0.139626	0.428267
Glycated haemoglobin levels	iRBD	rs4985996	0.102936	0.139339	0.460061
Glycated haemoglobin levels	iRBD	rs521048	0.125598	0.138116	0.363158
Glycated haemoglobin levels	iRBD	rs550057	0.104636	0.140295	0.455771
Glycated haemoglobin levels	iRBD	rs55770587	0.116763	0.139403	0.402258
Glycated haemoglobin levels	iRBD	rs56395926	0.108451	0.139527	0.436994
Glycated haemoglobin levels	iRBD	rs56777435	0.112913	0.139565	0.418495
Glycated haemoglobin levels	iRBD	rs57060554	0.116361	0.13925	0.403365
Glycated haemoglobin levels	iRBD	rs57625745	0.110276	0.139608	0.42959
Glycated haemoglobin levels	iRBD	rs57696714	0.0977899	0.13998	0.484802
Glycated haemoglobin levels	iRBD	rs57787629	0.110593	0.139611	0.428273
Glycated haemoglobin levels	iRBD	rs57891429	0.10841	0.139542	0.43722
Glycated haemoglobin levels	iRBD	rs58310247	0.109911	0.139577	0.431015
Glycated haemoglobin levels	iRBD	rs59034241	0.11222	0.139609	0.421503
Glycated haemoglobin levels	iRBD	rs592423	0.101838	0.139378	0.464985
Glycated haemoglobin levels	iRBD	rs603923	0.105791	0.139368	0.447806
Glycated haemoglobin levels	iRBD	rs60426421	0.113547	0.139517	0.415729
Glycated haemoglobin levels	iRBD	rs6045615	0.103527	0.139229	0.457135
Glycated haemoglobin levels	iRBD	rs6077396	0.120288	0.139249	0.387679
Glycated haemoglobin levels	iRBD	rs60833263	0.104857	0.139508	0.45228
Glycated haemoglobin levels	iRBD	rs61138219	0.104588	0.139307	0.452792
Glycated haemoglobin levels	iRBD	rs61750929	0.128432	0.140592	0.360974
Glycated haemoglobin levels	iRBD	rs61850681	0.128153	0.139295	0.357567
Glycated haemoglobin levels	iRBD	rs61944004	0.101389	0.13971	0.468018
Glycated haemoglobin levels	iRBD	rs61963209	0.113427	0.139472	0.41607
Glycated haemoglobin levels	iRBD	rs62036942	0.110931	0.13959	0.426792
Glycated haemoglobin levels	iRBD	rs62132522	0.111618	0.139596	0.423955
Glycated haemoglobin levels	iRBD	rs62466318	0.117027	0.138908	0.399519
Glycated haemoglobin levels	iRBD	rs62585575	0.106381	0.13916	0.444597
Glycated haemoglobin levels	iRBD	rs636089	0.120615	0.138811	0.384895
Glycated haemoglobin levels	iRBD	rs6445826	0.111158	0.139585	0.425832
Glycated haemoglobin levels	iRBD	rs6518681	0.117092	0.139547	0.401419
Glycated haemoglobin levels	iRBD	rs6583177	0.104087	0.138935	0.453749
Glycated haemoglobin levels	iRBD	rs6584535	0.111341	0.139589	0.425079
Glycated haemoglobin levels	iRBD	rs6589939	0.118821	0.139246	0.393485
Glycated haemoglobin levels	iRBD	rs67131976	0.110344	0.14021	0.43129
Glycated haemoglobin levels	iRBD	rs6720896	0.104769	0.139096	0.451322
Glycated haemoglobin levels	iRBD	rs6736362	0.115327	0.139558	0.408593
Glycated haemoglobin levels	iRBD	rs6777684	0.103841	0.139659	0.45716
Glycated haemoglobin levels	iRBD	rs6785881	0.100204	0.13921	0.471644
Glycated haemoglobin levels	iRBD	rs6840504	0.115032	0.139515	0.409646
Glycated haemoglobin levels	iRBD	rs6844176	0.112865	0.139531	0.418581
Glycated haemoglobin levels	iRBD	rs6893283	0.121555	0.138881	0.381443
Glycated haemoglobin levels	iRBD	rs7025532	0.11439	0.139864	0.413433
Glycated haemoglobin levels	iRBD	rs7124355	0.096149	0.138614	0.487903
Glycated haemoglobin levels	iRBD	rs7126413	0.114969	0.13933	0.409282
Glycated haemoglobin levels	iRBD	rs71603867	0.109445	0.139605	0.433063
Glycated haemoglobin levels	iRBD	rs7195055	0.108626	0.13957	0.436396
Glycated haemoglobin levels	iRBD	rs72683923	0.107302	0.13931	0.441158
Glycated haemoglobin levels	iRBD	rs72698718	0.113954	0.13958	0.414265
Glycated haemoglobin levels	iRBD	rs72753548	0.104627	0.139095	0.451929
Glycated haemoglobin levels	iRBD	rs72765381	0.116704	0.139106	0.401492
Glycated haemoglobin levels	iRBD	rs72805701	0.116885	0.139308	0.401444
Glycated haemoglobin levels	iRBD	rs72811487	0.109958	0.139678	0.431151
Glycated haemoglobin levels	iRBD	rs72814215	0.114798	0.139406	0.410238
Glycated haemoglobin levels	iRBD	rs72900998	0.123311	0.13906	0.375218
Glycated haemoglobin levels	iRBD	rs72973028	0.115753	0.139116	0.405376
Glycated haemoglobin levels	iRBD	rs7306544	0.115699	0.139386	0.406505
Glycated haemoglobin levels	iRBD	rs73564493	0.114153	0.1396	0.413522
Glycated haemoglobin levels	iRBD	rs73856768	0.110018	0.139644	0.430789
Glycated haemoglobin levels	iRBD	rs7400121	0.104732	0.139923	0.45416
Glycated haemoglobin levels	iRBD	rs74857652	0.107818	0.139429	0.439355
Glycated haemoglobin levels	iRBD	rs75367758	0.109698	0.139657	0.432171
Glycated haemoglobin levels	iRBD	rs7546390	0.113686	0.139607	0.415455
Glycated haemoglobin levels	iRBD	rs7564145	0.105108	0.139121	0.44994
Glycated haemoglobin levels	iRBD	rs76413056	0.105606	0.139291	0.448352
Glycated haemoglobin levels	iRBD	rs76505278	0.111453	0.139629	0.424748
Glycated haemoglobin levels	iRBD	rs7679687	0.101995	0.140501	0.467874
Glycated haemoglobin levels	iRBD	rs76827930	0.115409	0.139275	0.407308
Glycated haemoglobin levels	iRBD	rs76895963	0.10626	0.140247	0.44865
Glycated haemoglobin levels	iRBD	rs7720275	0.118862	0.139309	0.393535
Glycated haemoglobin levels	iRBD	rs7732130	0.11857	0.139609	0.395714
Glycated haemoglobin levels	iRBD	rs7798364	0.113306	0.139508	0.416686
Glycated haemoglobin levels	iRBD	rs78588343	0.118239	0.139629	0.397102
Glycated haemoglobin levels	iRBD	rs7903146	0.125333	0.141748	0.376593
Glycated haemoglobin levels	iRBD	rs79121130	0.118803	0.139745	0.395245
Glycated haemoglobin levels	iRBD	rs79221399	0.105305	0.139404	0.450015
Glycated haemoglobin levels	iRBD	rs7923837	0.0993622	0.139595	0.476595
Glycated haemoglobin levels	iRBD	rs79514927	0.107167	0.139389	0.441991
Glycated haemoglobin levels	iRBD	rs797399	0.105575	0.139365	0.448725
Glycated haemoglobin levels	iRBD	rs79755767	0.114802	0.139631	0.410972
Glycated haemoglobin levels	iRBD	rs8006908	0.104105	0.139078	0.454138
Glycated haemoglobin levels	iRBD	rs8013143	0.108694	0.139651	0.436374
Glycated haemoglobin levels	iRBD	rs8050500	0.119225	0.139557	0.392934
Glycated haemoglobin levels	iRBD	rs8069197	0.114199	0.139542	0.413137
Glycated haemoglobin levels	iRBD	rs8078338	0.128667	0.138468	0.352777
Glycated haemoglobin levels	iRBD	rs8110787	0.110678	0.139766	0.428428
Glycated haemoglobin levels	iRBD	rs8176059	0.118983	0.139145	0.392496
Glycated haemoglobin levels	iRBD	rs838717	0.117018	0.139354	0.401067
Glycated haemoglobin levels	iRBD	rs849142	0.0988863	0.139488	0.478372
Glycated haemoglobin levels	iRBD	rs853773	0.0786494	0.141428	0.578136
Glycated haemoglobin levels	iRBD	rs855791	0.119869	0.141405	0.396604
Glycated haemoglobin levels	iRBD	rs857725	0.14148	0.141493	0.317354
Glycated haemoglobin levels	iRBD	rs878521	0.122074	0.142154	0.390482
Glycated haemoglobin levels	iRBD	rs8887	0.107923	0.139499	0.439137
Glycated haemoglobin levels	iRBD	rs918739	0.116301	0.139604	0.404801
Glycated haemoglobin levels	iRBD	rs9273368	0.112493	0.139693	0.420654
Glycated haemoglobin levels	iRBD	rs9303620	0.114455	0.139789	0.412917
Glycated haemoglobin levels	iRBD	rs9314323	0.113151	0.139515	0.417345
Glycated haemoglobin levels	iRBD	rs9320429	0.119842	0.138719	0.387634
Glycated haemoglobin levels	iRBD	rs9323450	0.108443	0.139542	0.437081
Glycated haemoglobin levels	iRBD	rs9376091	0.108284	0.140046	0.439401
Glycated haemoglobin levels	iRBD	rs9398642	0.111186	0.139595	0.425748
Glycated haemoglobin levels	iRBD	rs9423289	0.104685	0.139351	0.452513
Glycated haemoglobin levels	iRBD	rs9479509	0.115944	0.139288	0.40518
Glycated haemoglobin levels	iRBD	rs9494600	0.102099	0.138497	0.461007
Glycated haemoglobin levels	iRBD	rs9892222	0.106236	0.139496	0.446316
Glycated haemoglobin levels	iRBD	rs998584	0.110173	0.139721	0.430393
Glycated haemoglobin levels	iRBD	rs9994509	0.101371	0.139271	0.466696
Glycated haemoglobin levels	iRBD	All	0.11072	0.139297	0.426703
Fasting insulin levels	iRBD	rs10865959	-0.557794	0.680079	0.412108
Fasting insulin levels	iRBD	rs116141873	-0.638836	0.686062	0.351769
Fasting insulin levels	iRBD	rs118164457	-0.496522	0.677308	0.463509
Fasting insulin levels	iRBD	rs12454712	-0.703642	0.68239	0.302474
Fasting insulin levels	iRBD	rs1260326	-0.705891	0.707123	0.318154
Fasting insulin levels	iRBD	rs13389219	-0.650612	0.695333	0.349436
Fasting insulin levels	iRBD	rs1474696	-0.751398	0.683738	0.271787
Fasting insulin levels	iRBD	rs17036126	-0.67061	0.682424	0.325761
Fasting insulin levels	iRBD	rs2943646	-0.736555	0.710635	0.299981
Fasting insulin levels	iRBD	rs35000407	-0.711317	0.687304	0.300697
Fasting insulin levels	iRBD	rs3775380	-0.737804	0.678876	0.277124
Fasting insulin levels	iRBD	rs459193	-0.749549	0.686683	0.275031
Fasting insulin levels	iRBD	rs4865796	-0.528087	0.685671	0.441196
Fasting insulin levels	iRBD	rs62271373	-0.718403	0.678921	0.289985
Fasting insulin levels	iRBD	rs6487237	-0.635266	0.681499	0.351254
Fasting insulin levels	iRBD	rs6855363	-0.711193	0.679045	0.294941
Fasting insulin levels	iRBD	rs7012814	-0.326853	0.702128	0.641561
Fasting insulin levels	iRBD	rs7133378	-0.569523	0.679581	0.402002
Fasting insulin levels	iRBD	rs73013411	-0.575007	0.679228	0.39724
Fasting insulin levels	iRBD	rs75179845	-0.802209	0.67762	0.236468
Fasting insulin levels	iRBD	rs860598	-0.77474	0.680691	0.255051
Fasting insulin levels	iRBD	rs9884482	-0.836454	0.679699	0.218463
Fasting insulin levels	iRBD	All	-0.663593	0.669603	0.321673

[truncated: 3 more sheets: S10, S11, S12]
